# Supplementary material for: Accurate and predictive antibody repertoire profiling by molecular amplification fingerprinting
Source: PubMed Central journal article supplement — Sci Adv. 2016 Mar 11;2(3):e1501371. doi: 10.1126/sciadv.1501371 (PMC4795664; doi:10.1126/sciadv.1501371), 2016-03-11
Supplement: 1501371_SM.pdf [file 1501371_SM.pdf]

## Supplementary Materials for

### Accurate and predictive antibody repertoire profiling by molecular amplification fingerprinting

Tarik A. Khan, Simon Friedensohn, Arthur R. Gorter de Vries, Jakub Straszewski,  
Hans-Joachim Ruscheweyh, Sai T. Reddy

Published 11 March 2016, *Sci. Adv.* **2**, e1501371 (2016)  
DOI: 10.1126/sciadv.1501371

#### The PDF file includes:

##### Materials and Methods

- Fig. S1. The 5'UTR lengths of mouse IGHV transcripts.
- Fig. S2. Antibody synthetic spike-in genes.
- Fig. S3. Nucleotide sequence logos of the primer-binding regions of selected spike-in clones.
- Fig. S4. Precise library quantification by linking qPCR to ddPCR.
- Fig. S5. Annotated example of biological sequence obtained from MAF library preparation.
- Fig. S6. Design of experiments (DoE) for library preparation optimization.
- Fig. S7. Response surface methodology analysis of clonal frequency bias with uncorrected data.
- Fig. S8. Response surface methodology analysis of CDR3 diversity.
- Fig. S9. Response surface methodology analysis of clonal frequency bias with MAF-corrected data.
- Fig. S10. Comparison of V-gene coverage using new reduced primer set (TAK) and previously published primer set (Reddy-2010).
- Fig. S11. Schematic of multistage error correction pipeline.
- Fig. S12. Flow chart of multistage error correction pipeline.
- Fig. S13. Error correction effects on various bias correction methods.
- Fig. S14. Bias correction using MAF V-gene bias factor.
- Fig. S15. Comparison of bias correction with a new reduced primer set (TAK) and a previously published primer set (Reddy-2010).
- Fig. S16. Comparison of V-gene (germlines) before and after MAF correction.
- Fig. S17. The MAF bias factor across V-genes.
- Fig. S18. Correlation of MAF bias correction factor across data sets.

Fig. S19. Nominal logistic regression modeling based on Ig-seq clonotype measurements.

Fig. S20. Comparison of the sensitivity and specificity of the nominal logistic regression models.

Fig. S21. Comparison of factor correlations with prediction probabilities of the nominal logistic regression models.

Fig. S22. Various immune profiling metrics from MAF-corrected Ig-seq data.

Fig. S23. Processing time of reads for MAF error and bias correction pipeline.

Fig. S24. Effect of the number of reads analyzed using final MAF sample preparation conditions.

Table S1. Ig-seq read count statistics for spike-ins following replicate library preparation by singleplex PCR (see fig. S2, B and C).

Table S2. Ig-seq read count statistics following MAF library preparation by multiplex PCR (see Fig. 2A).

Table S3. A comparison of the VDJ annotation tool used in this study (modified from Laserson *et al.* (12) with IMGT HighV-Quest.

Table. S4. Ig-seq read count statistics for DoE for library preparation optimization.

Table S5. A complete list of primers and sequences used in this study.

Table S6. Error correction statistics for spike in clones.

Table S7. Expanded Ig-seq processing statistics.

Table S8. Synthetic genes used in this study.

## Supplementary Materials

### Supplementary Materials and Methods

#### *Design of Experiments (DoE) for library preparation optimization*

Based on pilot experiments we determined four potential critical process parameters: 1) quantity of input cDNA copies, 2) number of cycles in the 1<sup>st</sup>-step multiplex-PCR, 3) quantity of DNA copies input into 2<sup>nd</sup>-step adapter-extension-PCR, and 4) number of sequencing reads analyzed. Therefore we designed a Design of Experiments central composite design with two center points (10 individual sample preparations, fig. S6) based on the three experimental factors: 1, 2, and 3 (above). We then used *in silico* subsampling of reads (following CLC Genomics Workbench pre-processing and quality-filtering of merged reads) used as an input into the MAF pipeline. The final product yield generated after the 2nd-step PCR was designed to be constant to ensure enough material for NGS, while not subjecting the sample to over-amplification (PCR chimeras are more likely when the template:primer ratio is high, fig. S4). Therefore the correlated ddPCR-qPCR data was used to guide the amount of input copies from the purified product of 1st-step multiplex-PCR into the 2nd-step adaptor-extension-PCR reaction. This analysis was performed on RNA extracted from hyperimmunized splenocytes from a single mouse with the new TAK multiplex-PCR primer set for mouse V<sub>H</sub> (excluding TAK\_612). 13 spike-in clones (excluding IGHV1S81\*02 clones) were analyzed to illustrate the influence of sample preparation on clonal frequency accuracy. The dataset S16 produced a lower number of reads and only the lowest read sampling level was used for analysis. All three-way interactions and curvature effects were analyzed to determine significant effects using the software platform JMP 11 (figs. S7A, S8A, and S9A). Then only the significant factors were used to generate modeled data (figs. S7B-C, S8B-C, and S9B-C).

#### *Nominal Logistic Regression Modeling to Predict Immune Status of Clones*

Nominal logistic regression modeling analyzes multivariate data that is categorically labeled with different statuses (e.g. sample material from hyperimmunized or untreated mice). This process generates a model that predicts based on the individual data points (clonotypes) which category (hyperimmunized or untreated) best fits. On a global level the average degree of separation may be used to compare the similarity (and difference) of immune status. While on the clonotype level, the separation represents if a given clonotype was responsive to immunization or antigen exposure. The top 100 ranked clonotypes (based on frequency) of all data sets,  $n = 3$  samples from three separate hyperimmunized mice (IM\_1a, IM\_2, and IM\_3) and  $n = 3$  samples from untreated mice (UM\_1, UM\_2, and UM\_3), were analyzed based on three parameters: log (MAF bias corrected frequency), intraclonotype diversity index (IDI), and non-silent somatic hypermutations (SHM (ns)). The model factors consisted of all main effects, curvature of main effects, secondary interactions, and the tertiary interactions (Supplementary fig. S19B). The significant factors were found to be (in order of importance): log(frequency), IDI, SHM (ns), and log(frequency)\*IDI. In contrast the uncorrected data (fig. S19A) did not find the main effect of log(frequency) to be significant, likely due to inaccurate frequencies. The overall model performance of the MAF corrected data was improved, represented by an area under the curve of the receiver operating characteristic (AUC of ROC) of 0.94, in contrast AUC was 0.78 for the uncorrected data (fig. S20A-B). The models were then reduced to the significant factors of the MAF corrected data (fig. S20C-D), which maintain similar AUC values (figs. S20C-D). The probabilities of the reduced modeled data were plotted with each parameter used in the model, as well as the non-modeled clonotype rank (by frequency) (fig. S21). The uncorrected data showed a clear correlation of probability with SHM (ns), while the MAF corrected data has the strongest correlation with IDI. The same reduced factors were used to perform three training-test models using the following data sets: model 1) training: (IM\_2, IM\_3, UM\_2, UM\_3) test: (IM\_1a, UM\_1); model 2) training: (IM\_1a, IM\_3, UM\_1, UM\_3) test: (IM\_2, UM\_2); model 3) training: (IM\_1a, IM\_2, UM\_1, UM\_2) test: (IM\_3, UM\_3). The results of the test data are presented in Figure 6B.

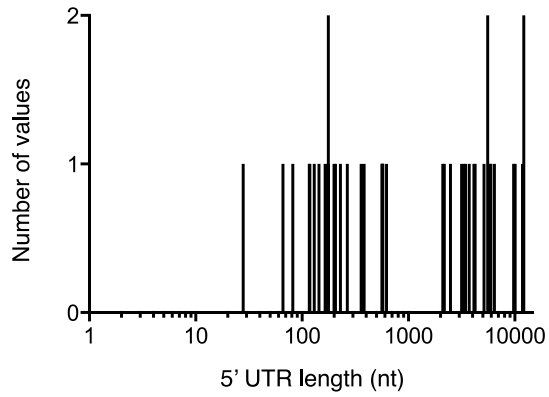

**Fig S1. The 5'UTR lengths of mouse IGHV transcripts.** The 5'UTR lengths of transcribed mouse IGHV genes were identified using the Immunogenetics Database (IMGT) website: <http://www.imgt.org/genedb/>. Several transcripts show very long 5'UTRs, for these genes it would not be possible to sequence a full-length VDJ region using a template-switching reaction [5' rapid amplification of cDNA ends (5' RACE)] (5'RACE) followed by PCR with a uniform primer. Full-length sequences that are returned by 5'RACE may be due to early termination products of 1st-strand synthesis, which would have their own inherent biases.



### A Synthetic antibody RNA standards used as spike-in controls

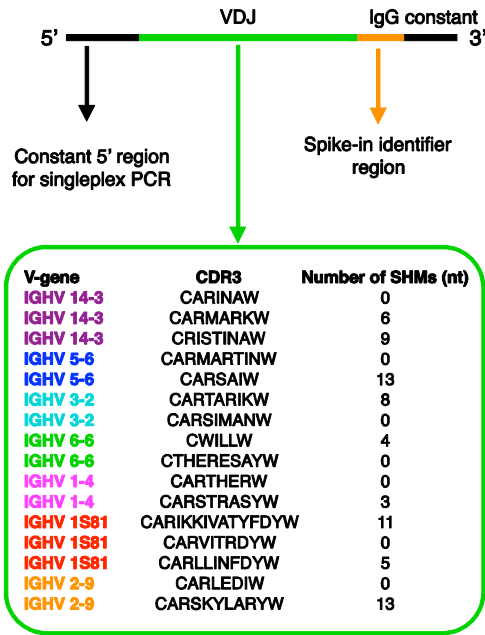

### B RT for 1st strand cDNA synthesis

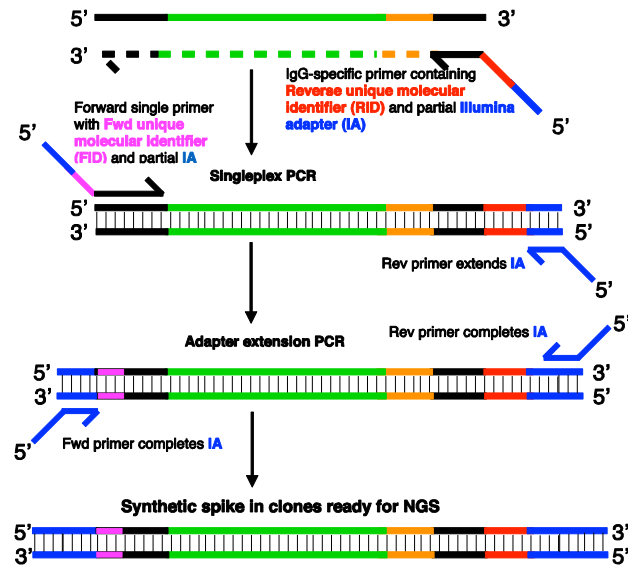

### C

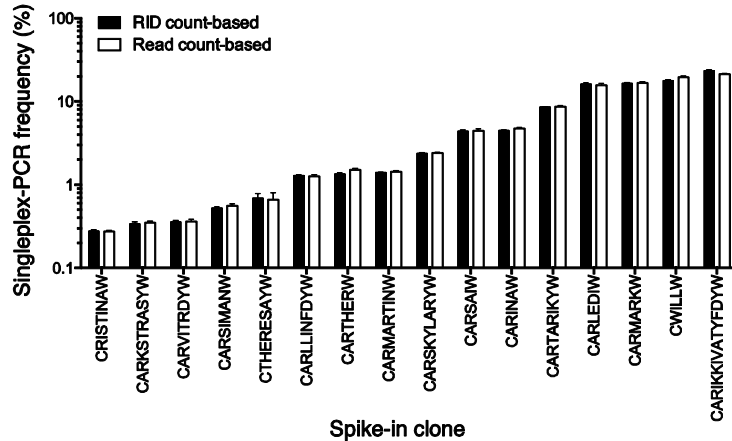

**Fig. S2. Antibody synthetic spike-in genes.** (A) All 16 synthetic spike-in clones were designed to have a 5' constant region used for singleplex PCR controls, a spike-in identifier region for ddPCR and bioinformatic sorting (following Ig-seq), and a partial region corresponding to mouse IgG constant region. The 16 spike-in clones have 16 unique CDR3 amino acid (a.a.) sequences, 7 different V-genes, designed positions of somatic hypermutation (SHM). More details on spike-in design can be found in Materials and Methods. (B) Workflow for library preparation of spike-ins for control experiments. A reverse transcription (RT) step is performed with mouse IgG-specific primer (TAK\_402) to generate first-strand cDNA with an RID and IA overhang. Singleplex PCR is performed with constant forward primer with an FID and IA overhang (TAK\_472) and constant reverse primer specific for IA (TAK\_423), followed by adapter-extension PCR with constant forward primer (TAK\_424) and reverse primer with Illumina index sequence (e.g., TAK\_531\_IDX1). A complete list of primer sequences can be found in table S4. FID regions were used for error correction on RID regions (see Materials and Methods). (C) Spike-in frequencies are shown as means  $\pm$  STD (based on RID-counts or Read-counts) obtained from replicate libraries ( $n = 5$ ) generated by singleplex PCR from a master stock pool (see Materials and Methods); datasets used are J1-J5 (see table S1). For all further analysis singleplex PCR spike-in frequencies were RID-count-based mean values.

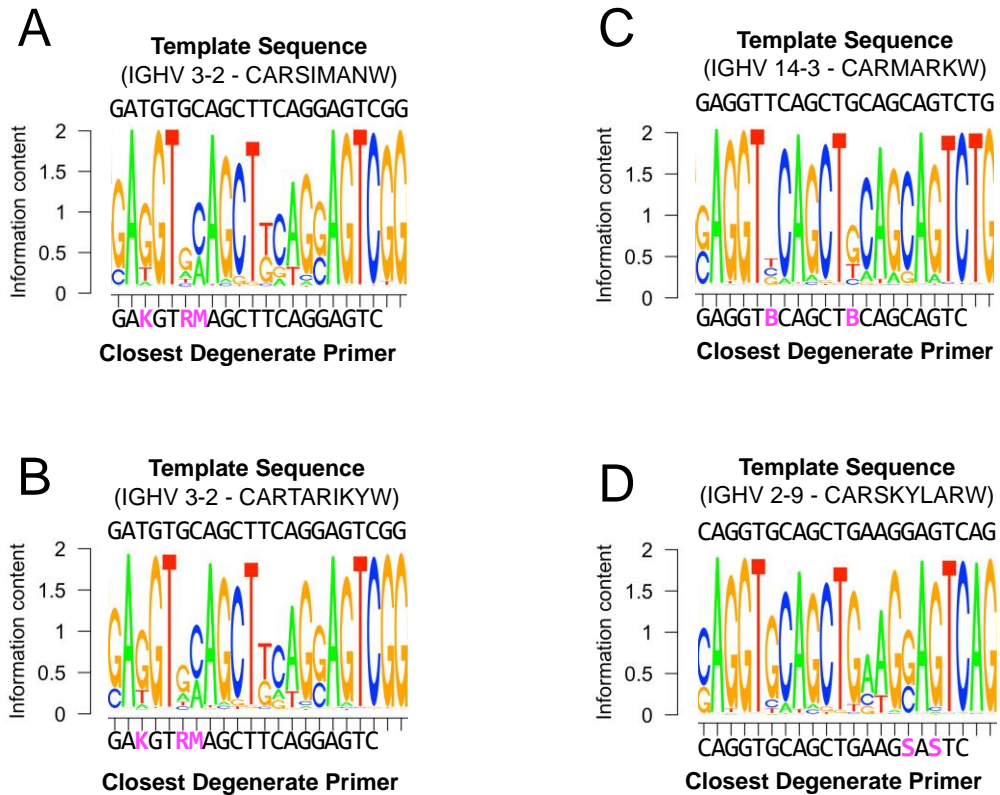

**Fig. S3. Nucleotide sequence logos of the primer-binding regions of selected spike-in clones.** A high diversity of nucleotides is observed in spike-in positions corresponding to both degenerate positions and non-degenerate positions in primers, suggesting the substantial mispriming is taking place during amplification. Mispriming appears to be systematic as different spike-ins sharing the same V-gene (e.g., IGHV 3-2) have similar nucleotide degeneracy in their primer binding regions. Ig-seq data are from multiplex PCR library preparation from mouse splenic cDNA with synthetic spike-ins (dataset Reddy-PS-1 was used, see **table S2**).

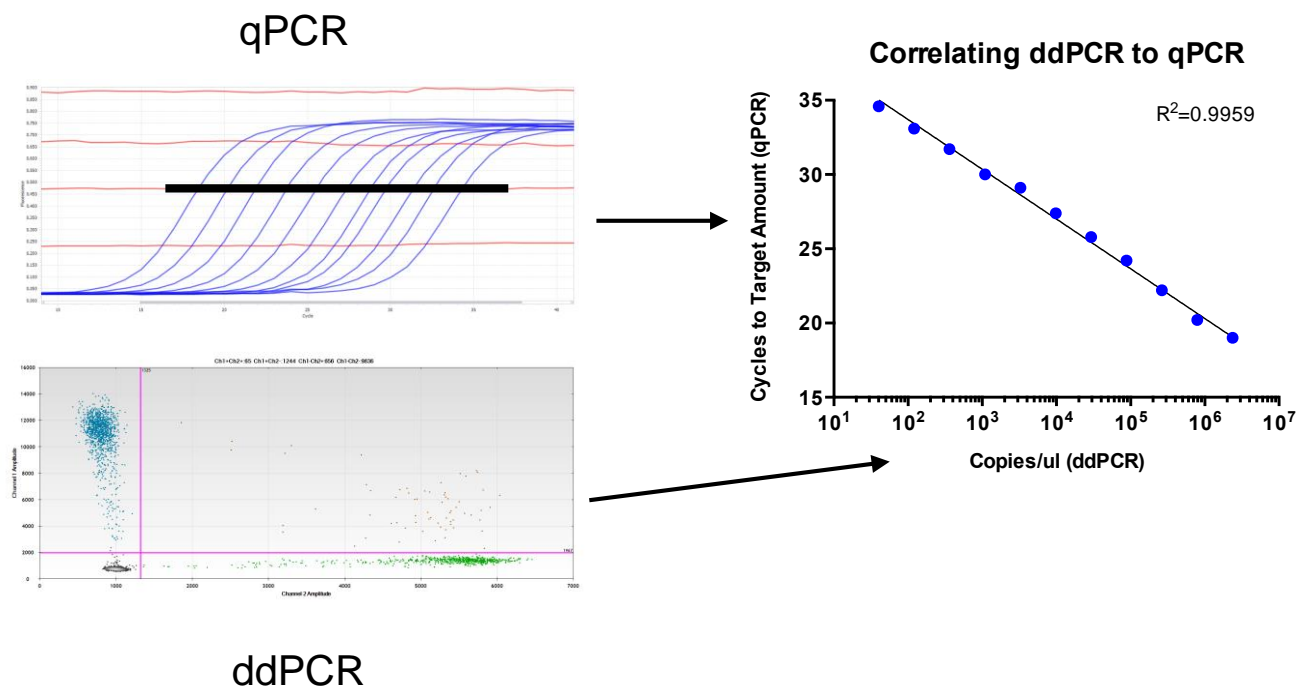

**Fig. S4. Precise library quantification by linking qPCR to ddPCR.** qPCR was used to visualize when reaction saturation occurs based on template amount and number of cycles, this data was then correlated to a ddPCR assay (using a synthetic minigene) which had a full natural antibody gene and Illumina adapters. This correlation allowed us to determine the proper number of cycles to use for the 2<sup>nd</sup>-step adapter-extension PCR reaction based on the desired number of ddPCR quantified copies of 1<sup>st</sup>-step multiplex PCR product. More details can be found in Materials and Methods.

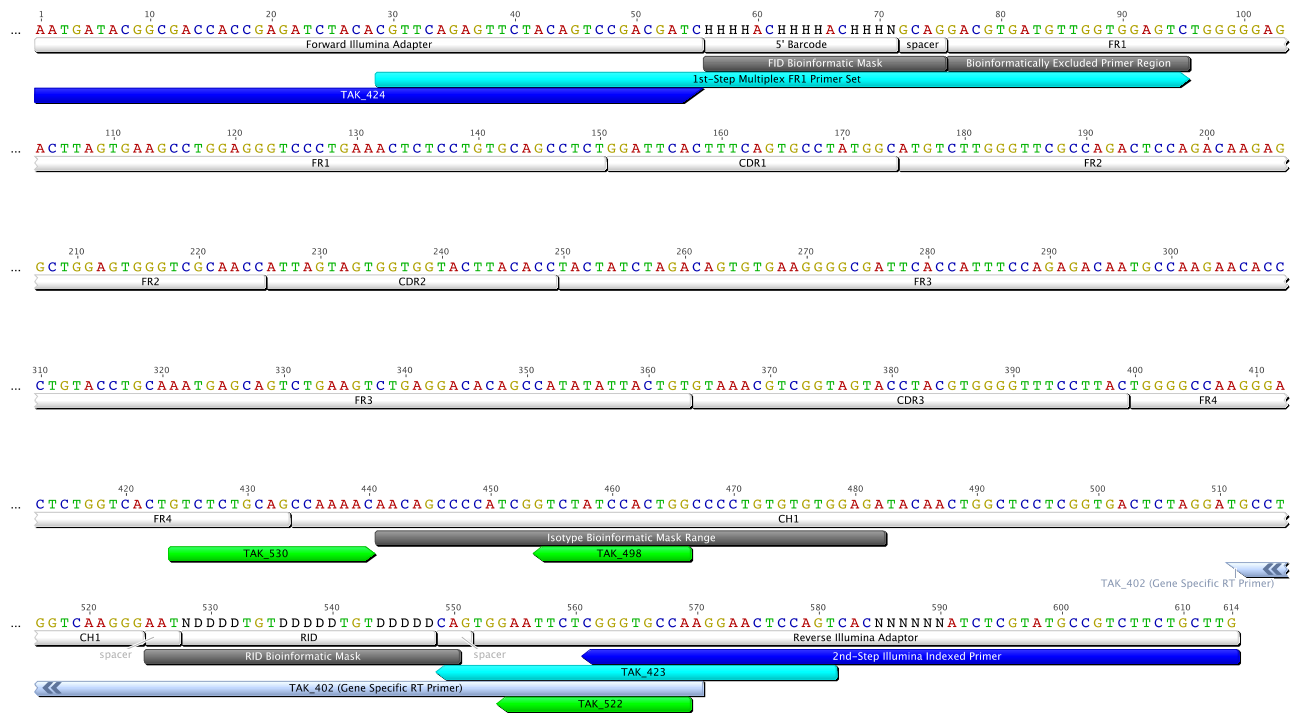

**Fig. S5. Annotated example of biological sequence obtained from MAF library preparation.**

Annotated colors correspond to the following:  
 White: Antibody sequence annotations  
 Dark grey: Bioinformatic annotations  
 Pale blue: RID tagged RT gene specific primer  
 Teal: 1st-step PCR primers  
 Dark blue: 2nd-step PCR primers  
 Green: ddPCR primers

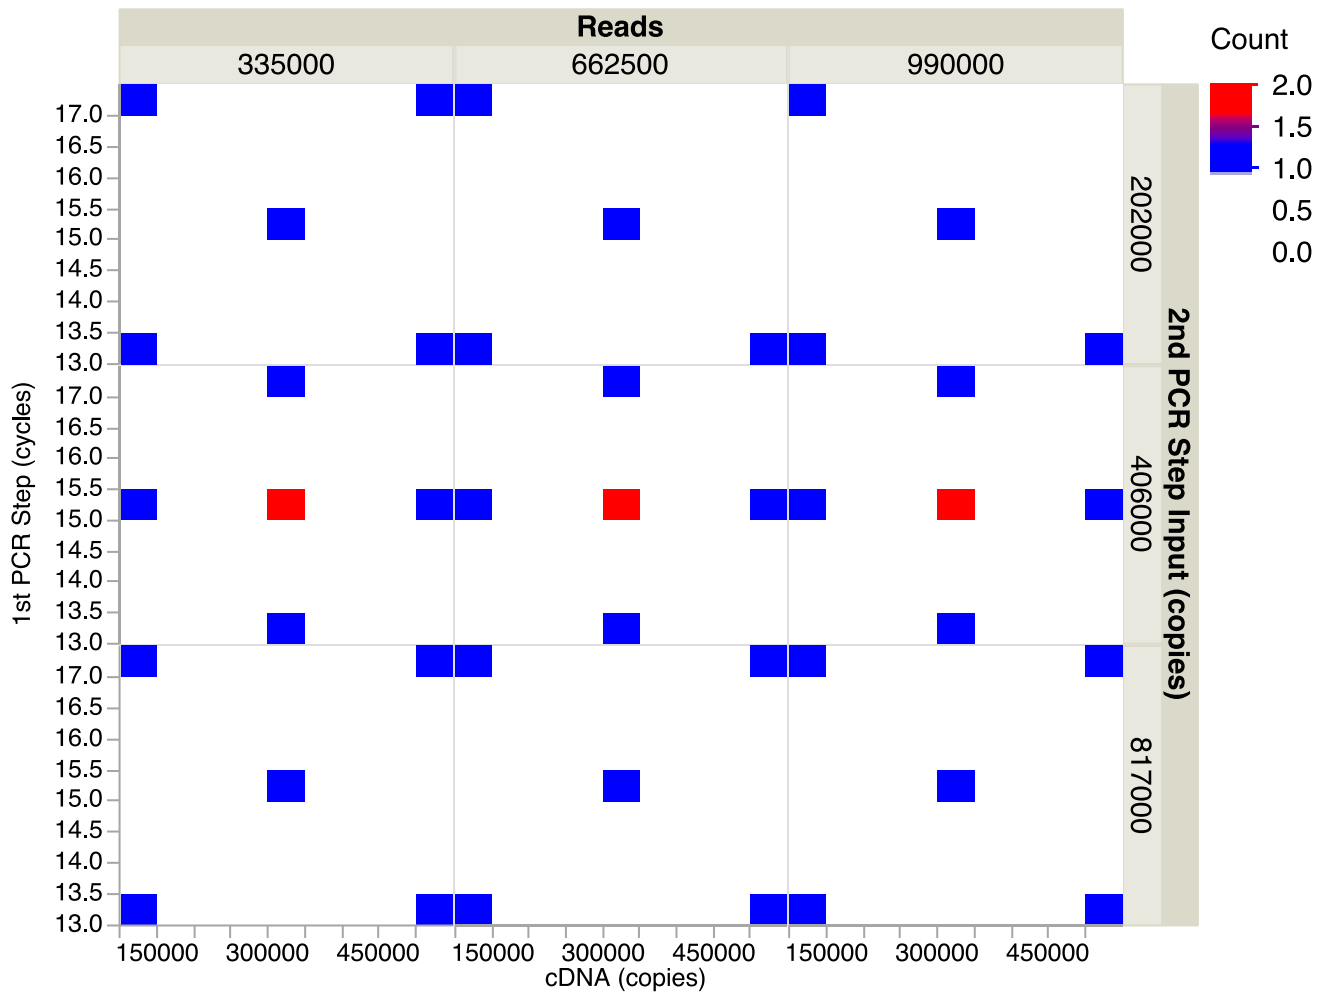

**Fig. S6. Design of experiments (DoE) for library preparation optimization.** A DoE, response surface central composite designed experiment was used to determine how several factors influenced library preparation and Ig-seq data. Factors shown are: 1) quantity of input cDNA copies, 2) number of cycles in the 1<sup>st</sup>-step multiplex PCR, 3) quantity of DNA copies input into 2<sup>nd</sup>-step adapter extension PCR, and 4) number of reads analyzed (based on *in silico* random sampling prior to bioinformatics pipeline analysis). For more information on DoE see Supplementary Materials and Methods.

A

Uncorrected read-based frequency bias

Sorted Parameter Estimates

| Term                                                               | Estimate  | Std Error | t Ratio | Prob> t |
|--------------------------------------------------------------------|-----------|-----------|---------|---------|
| 1st PCR Step (cycles)                                              | -0.026497 | 0.005656  | -4.68   | <.0001* |
| Reads                                                              | 5.9099e-8 | 1.537e-8  | 3.84    | 0.0007* |
| cDNA (copies)*1st PCR Step (cycles)*Log(2nd PCR Step Input Copies) | 0.0839914 | 0.02203   | 3.81    | 0.0007* |
| cDNA (copies)*1st PCR Step (cycles)                                | 0.0185172 | 0.006549  | 2.83    | 0.0087* |
| cDNA (copies)*Log(2nd PCR Step Input Copies)                       | -0.058982 | 0.021885  | -2.70   | 0.0120* |
| 1st PCR Step (cycles)*1st PCR Step (cycles)                        | 0.0226794 | 0.009577  | 2.37    | 0.0253* |
| cDNA (copies)*Reads                                                | 3.3554e-8 | 2.018e-8  | 1.66    | 0.1080  |
| cDNA (copies)                                                      | -0.007616 | 0.005656  | -1.35   | 0.1894  |
| Log(2nd PCR Step Input Copies)                                     | -0.024141 | 0.01886   | -1.28   | 0.2114  |
| Reads*Reads                                                        | -8.63e-14 | 7.82e-14  | -1.10   | 0.2793  |
| Reads*Log(2nd PCR Step Input Copies)                               | 6.3873e-8 | 6.719e-8  | 0.95    | 0.3502  |
| cDNA (copies)*cDNA(copies)                                         | 0.0066794 | 0.009577  | 0.70    | 0.4915  |
| 1st PCR Step (cycles)*Log(2nd PCR Step Input Copies)               | 0.0118846 | 0.021885  | 0.54    | 0.5916  |
| cDNA (copies)*Reads*Log(2nd PCR Step Input Copies)                 | 4.1037e-8 | 7.706e-8  | 0.53    | 0.5987  |
| 1st PCR Step (cycles)*Reads*Log(2nd PCR Step Input Copies)         | -4.071e-8 | 7.706e-8  | -0.53   | 0.6016  |
| Log(2nd PCR Step Input Copies)*Log(2nd PCR Step Input Copies)      | 0.0365919 | 0.104025  | 0.35    | 0.7277  |
| cDNA (copies)*1st PCR Step (cycles)*Reads                          | 6.5167e-9 | 2.338e-8  | 0.28    | 0.7826  |
| 1st PCR Step (cycles)*Reads                                        | 4.266e-9  | 2.018e-8  | 0.21    | 0.8342  |

B

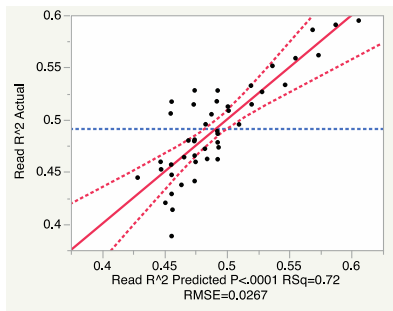

C

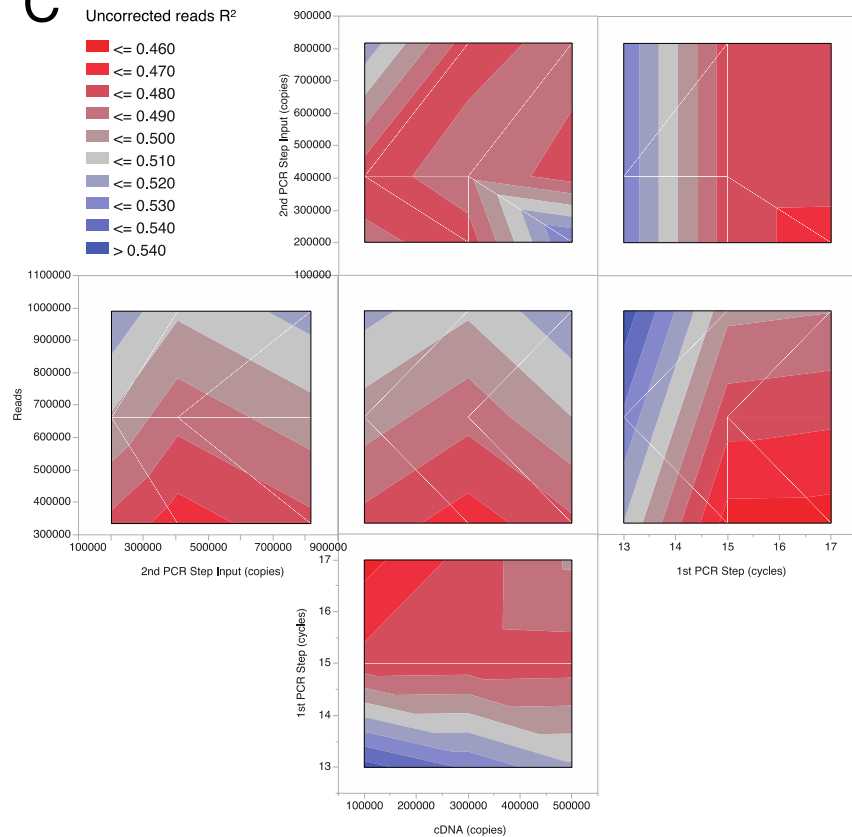

**Fig. S7. Response surface methodology analysis of clonal frequency bias with uncorrected data.** The  $R^2$  values correlating spike-ins multiplex PCR vs. control singleplex PCR library preparation are based computing frequencies using uncorrected read counts. For more information on DoE see Supplementary Materials and Methods.

A

CDR3 diversity

Sorted Parameter Estimates

| Term                                                               | Estimate  | Std Error | t Ratio | Prob> t |
|--------------------------------------------------------------------|-----------|-----------|---------|---------|
| cDNA (copies)                                                      | 174.68603 | 4.69752   | 37.19   | <.0001* |
| Reads                                                              | 0.0003755 | 1.277e-5  | 29.41   | <.0001* |
| cDNA (copies)*cDNA(copies)                                         | -116.1517 | 7.95428   | -14.60  | <.0001* |
| cDNA (copies)*Reads                                                | 0.0001763 | 1.676e-5  | 10.52   | <.0001* |
| Reads*Reads                                                        | -4.91e-10 | 6.49e-11  | -7.57   | <.0001* |
| Log(2nd PCR Step Input Copies)                                     | 104.51176 | 15.66333  | 6.67    | <.0001* |
| Reads*Log(2nd PCR Step Input Copies)                               | 0.0002479 | 5.58e-5   | 4.44    | <.0001* |
| cDNA (copies)*Reads*Log(2nd PCR Step Input Copies)                 | 0.0001792 | 0.000064  | 2.80    | 0.0093* |
| Log(2nd PCR Step Input Copies)*Log(2nd PCR Step Input Copies)      | -172.1165 | 86.39518  | -1.99   | 0.0565  |
| cDNA (copies)*Log(2nd PCR Step Input Copies)                       | 35.996971 | 18.17625  | 1.98    | 0.0579  |
| 1st PCR Step (cycles)*Log(2nd PCR Step Input Copies)               | 28.926654 | 18.17625  | 1.59    | 0.1231  |
| cDNA (copies)*1st PCR Step (cycles)*Log(2nd PCR Step Input Copies) | 22.995985 | 18.29675  | 1.26    | 0.2196  |
| 1st PCR Step (cycles)*1st PCR Step (cycles)                        | 9.8482689 | 7.95428   | 1.24    | 0.2263  |
| 1st PCR Step (cycles)*Reads*Log(2nd PCR Step Input Copies)         | 5.464e-5  | 0.000064  | 0.85    | 0.4008  |
| 1st PCR Step (cycles)*Reads                                        | -5.37e-6  | 1.676e-5  | -0.32   | 0.7511  |
| cDNA (copies)*1st PCR Step (cycles)                                | 1.0581282 | 5.43928   | 0.19    | 0.8472  |
| cDNA (copies)*1st PCR Step (cycles)*Reads                          | 2.1229e-6 | 1.942e-5  | 0.11    | 0.9138  |
| 1st PCR Step (cycles)                                              | -0.325376 | 4.69752   | -0.07   | 0.9453  |

B

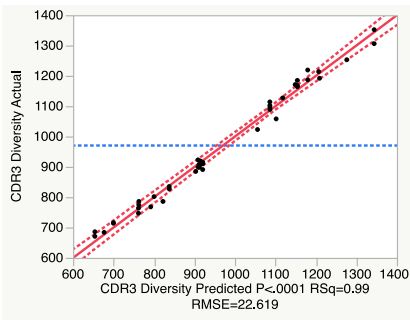

C

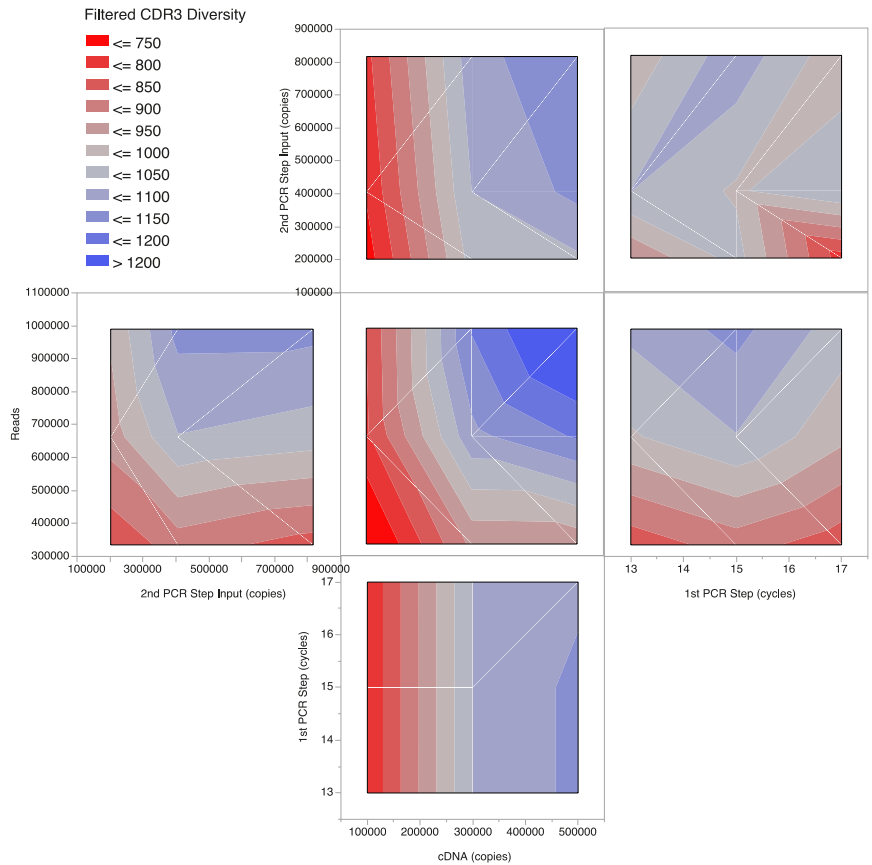

**Fig. S8. Response surface methodology analysis of CDR3 diversity.** The CDR3 diversity reported is based on MAF corrected data that removes flagged hotspot errors and clones that have less than three RIDs with three reads each. For more information on DoE see Supplementary Materials and Methods.

**A**

**MAF-corrected frequency bias**

| Sorted Parameter Estimates                                         |           |           |         |  |         |
|--------------------------------------------------------------------|-----------|-----------|---------|--|---------|
| Term                                                               | Estimate  | Std Error | t Ratio |  | Prob> t |
| cDNA (copies)                                                      | -0.098419 | 0.005195  | -18.95  |  | <.0001* |
| Reads                                                              | 1.8304e-7 | 1.412e-8  | 12.96   |  | <.0001* |
| cDNA (copies)*Reads                                                | 9.2977e-8 | 1.854e-8  | 5.02    |  | <.0001* |
| Reads*Reads                                                        | -2.89e-13 | 7.18e-14  | -4.03   |  | 0.0004* |
| cDNA (copies)*cDNA(copies)                                         | 0.0299659 | 0.008796  | 3.41    |  | 0.0021* |
| Log(2nd PCR Step Input Copies)*Log(2nd PCR Step Input Copies)      | -0.307517 | 0.09554   | -3.22   |  | 0.0033* |
| Reads*Log(2nd PCR Step Input Copies)                               | 1.8172e-7 | 6.171e-8  | 2.94    |  | 0.0066* |
| 1st PCR Step (cycles)*1st PCR Step (cycles)                        | 0.0248492 | 0.008796  | 2.82    |  | 0.0088* |
| Log(2nd PCR Step Input Copies)                                     | 0.0411777 | 0.017321  | 2.38    |  | 0.0248* |
| cDNA (copies)*Reads*Log(2nd PCR Step Input Copies)                 | 1.5545e-7 | 7.078e-8  | 2.20    |  | 0.0368* |
| 1st PCR Step (cycles)                                              | -0.009368 | 0.005195  | -1.80   |  | 0.0825  |
| 1st PCR Step (cycles)*Log(2nd PCR Step Input Copies)               | 0.0330879 | 0.0201    | 1.65    |  | 0.1113  |
| 1st PCR Step (cycles)*Reads*Log(2nd PCR Step Input Copies)         | -5.774e-8 | 7.078e-8  | -0.82   |  | 0.4218  |
| cDNA (copies)*1st PCR Step (cycles)*Reads                          | 1.4583e-8 | 2.148e-8  | 0.68    |  | 0.5029  |
| 1st PCR Step (cycles)*Reads                                        | 8.0222e-9 | 1.854e-8  | 0.43    |  | 0.6686  |
| cDNA (copies)*1st PCR Step (cycles)*Log(2nd PCR Step Input Copies) | -0.005436 | 0.020234  | -0.27   |  | 0.7902  |
| cDNA (copies)*1st PCR Step (cycles)                                | 0.0006495 | 0.006015  | 0.11    |  | 0.9148  |
| cDNA (copies)*Log(2nd PCR Step Input Copies)                       | -0.001596 | 0.0201    | -0.08   |  | 0.9373  |

**B**

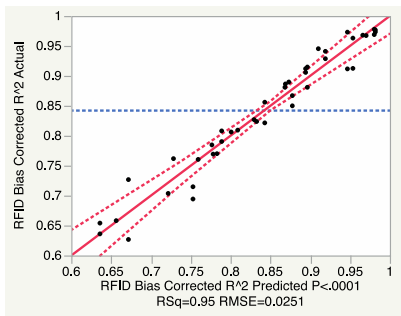

**C**

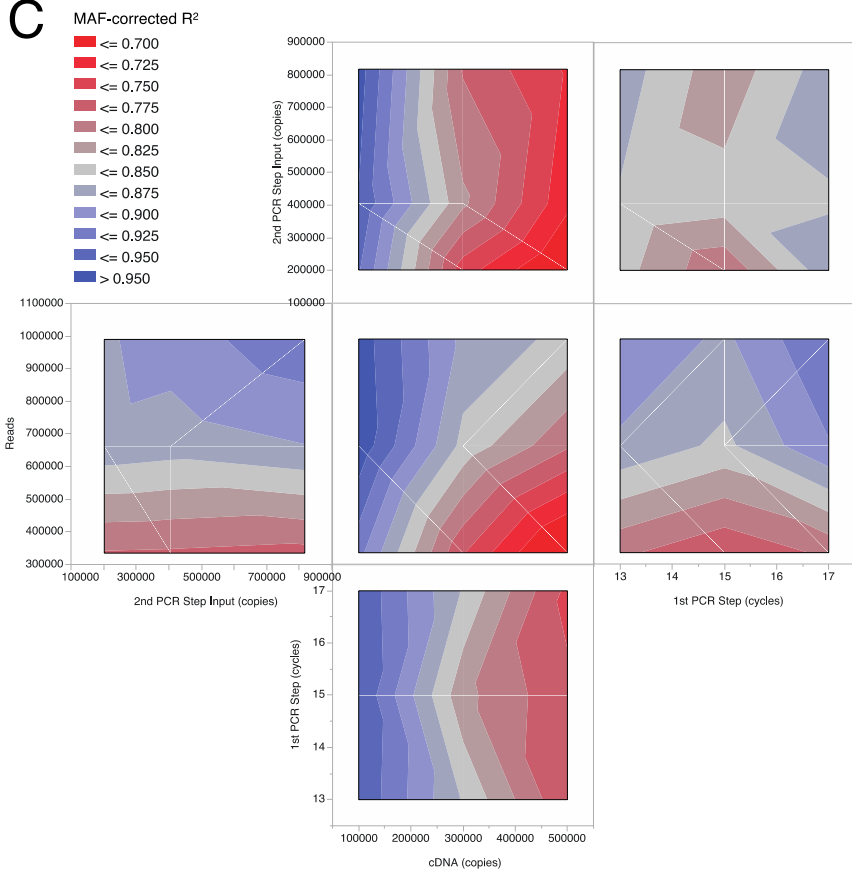

**Fig. S9. Response surface methodology analysis of clonal frequency bias with MAF-corrected data.** The  $R^2$  values correlating spike-ins multiplex PCR vs. control singleplex PCR library preparation is based on MAF bias corrected frequencies. For more information on DoE see Supplementary Materials and Methods.



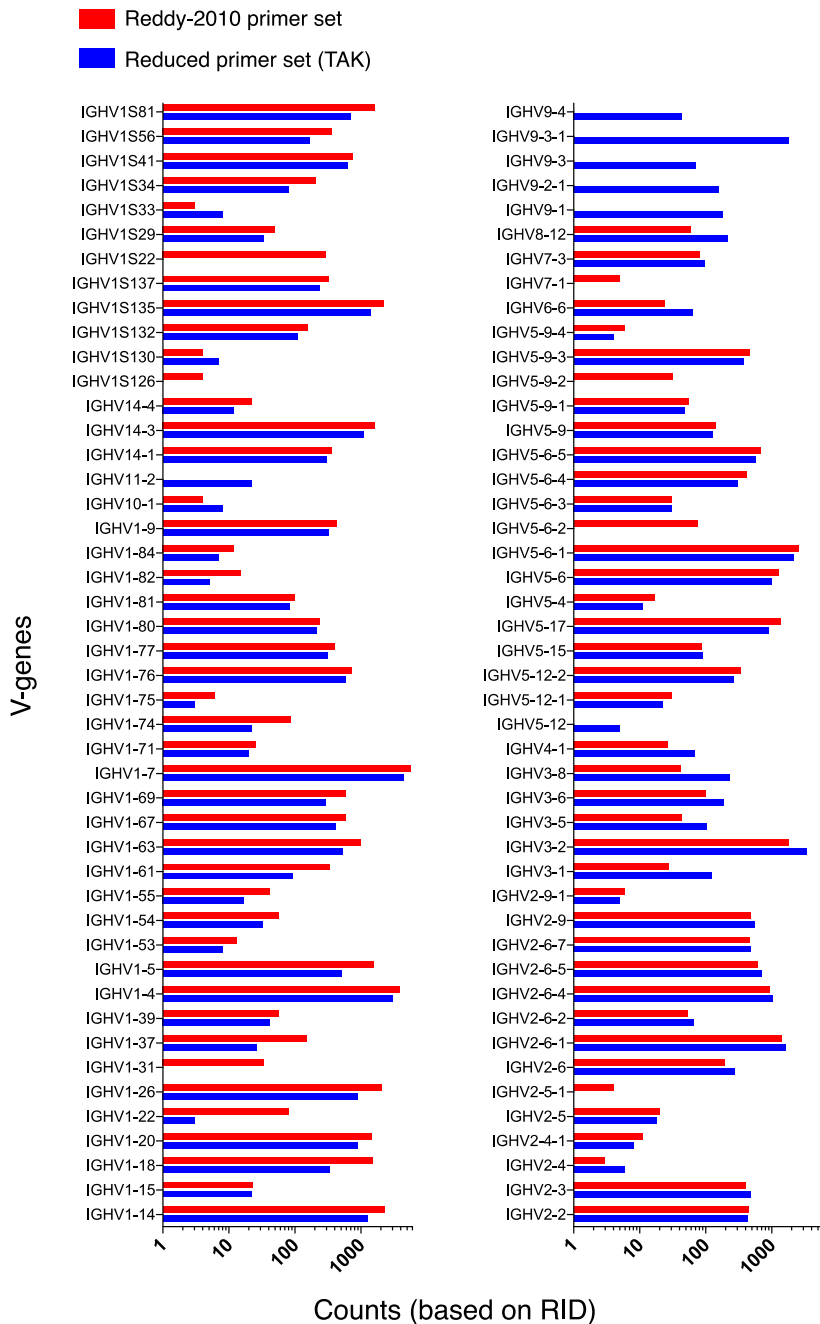

**Fig. S10. Comparison of V-gene coverage using new reduced primer set (TAK) and previously published primer set (Reddy-2010).** TAK primer set has a smaller number of primers but is still able to cover the majority of V-genes covered by Reddy-2010. Ig-seq was performed on samples from library preparation with the same starting material (immunized mouse splenic cDNA with ~10% spike-ins), but using TAK or Reddy-2010 primer sets for the multiplex PCR step. 650k preprocessed sequences for each data set were processed in the MAF bioinformatic pipeline. Datasets used are Reddy-PS-Compare and TAK-PS-Compare, see **table S2**. A complete list of primer sequences can be found in **table S5**.

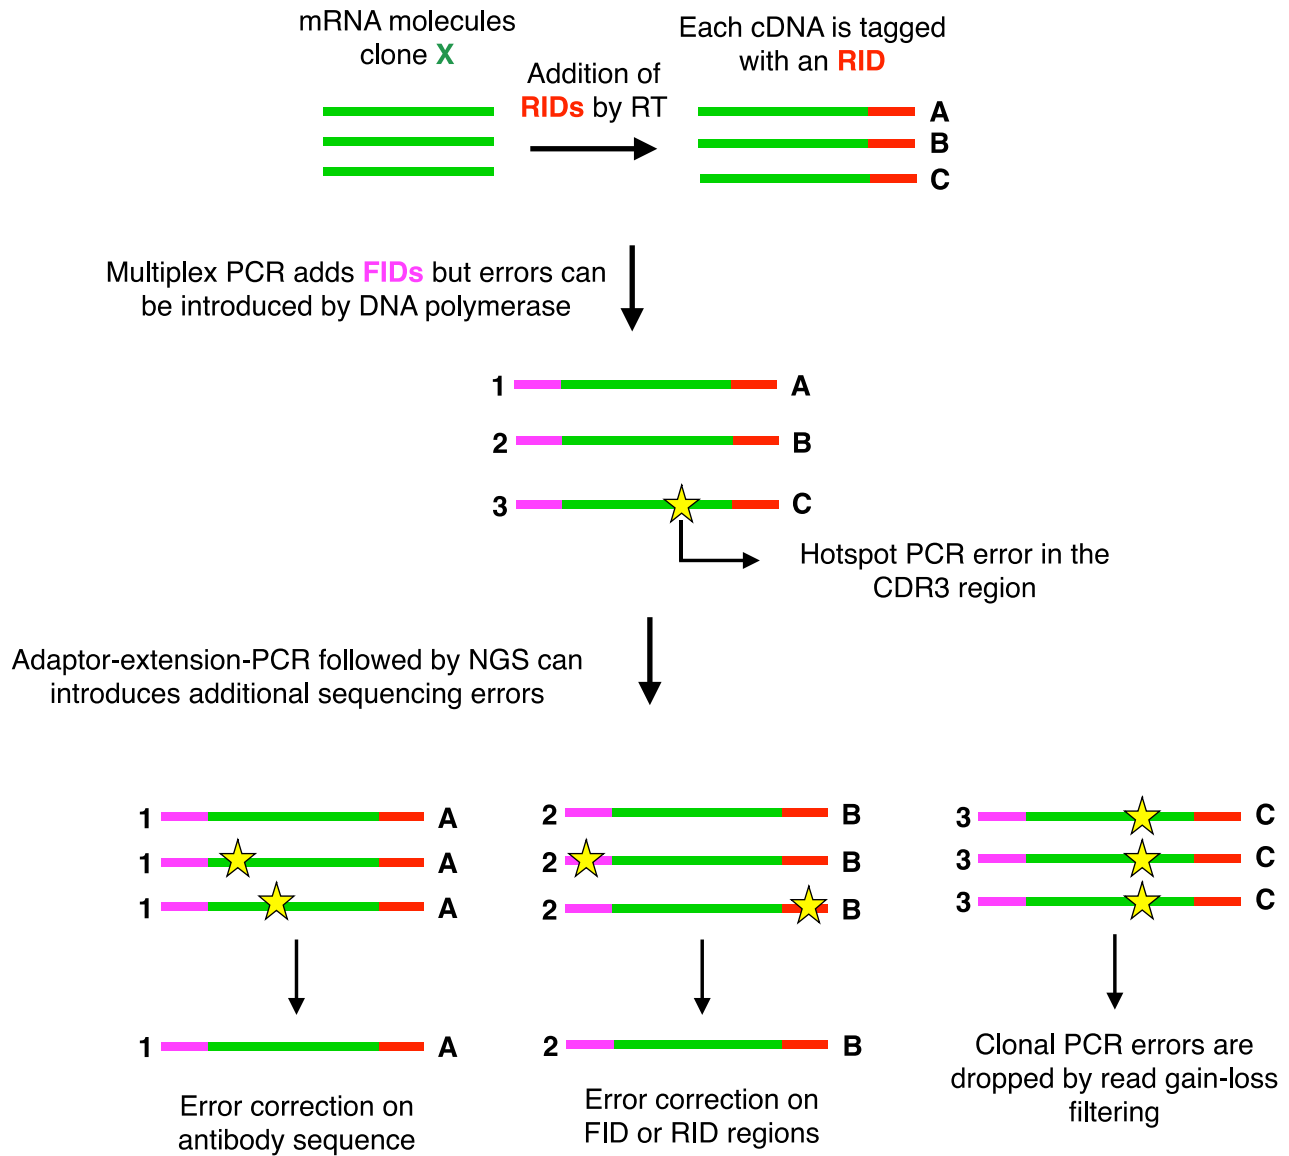

**Fig. S11. Schematic of multistage error correction pipeline.** For simplicity, Illumina adaptor regions are not shown. Further details of error correction methods can be found in Results and Materials and Methods.

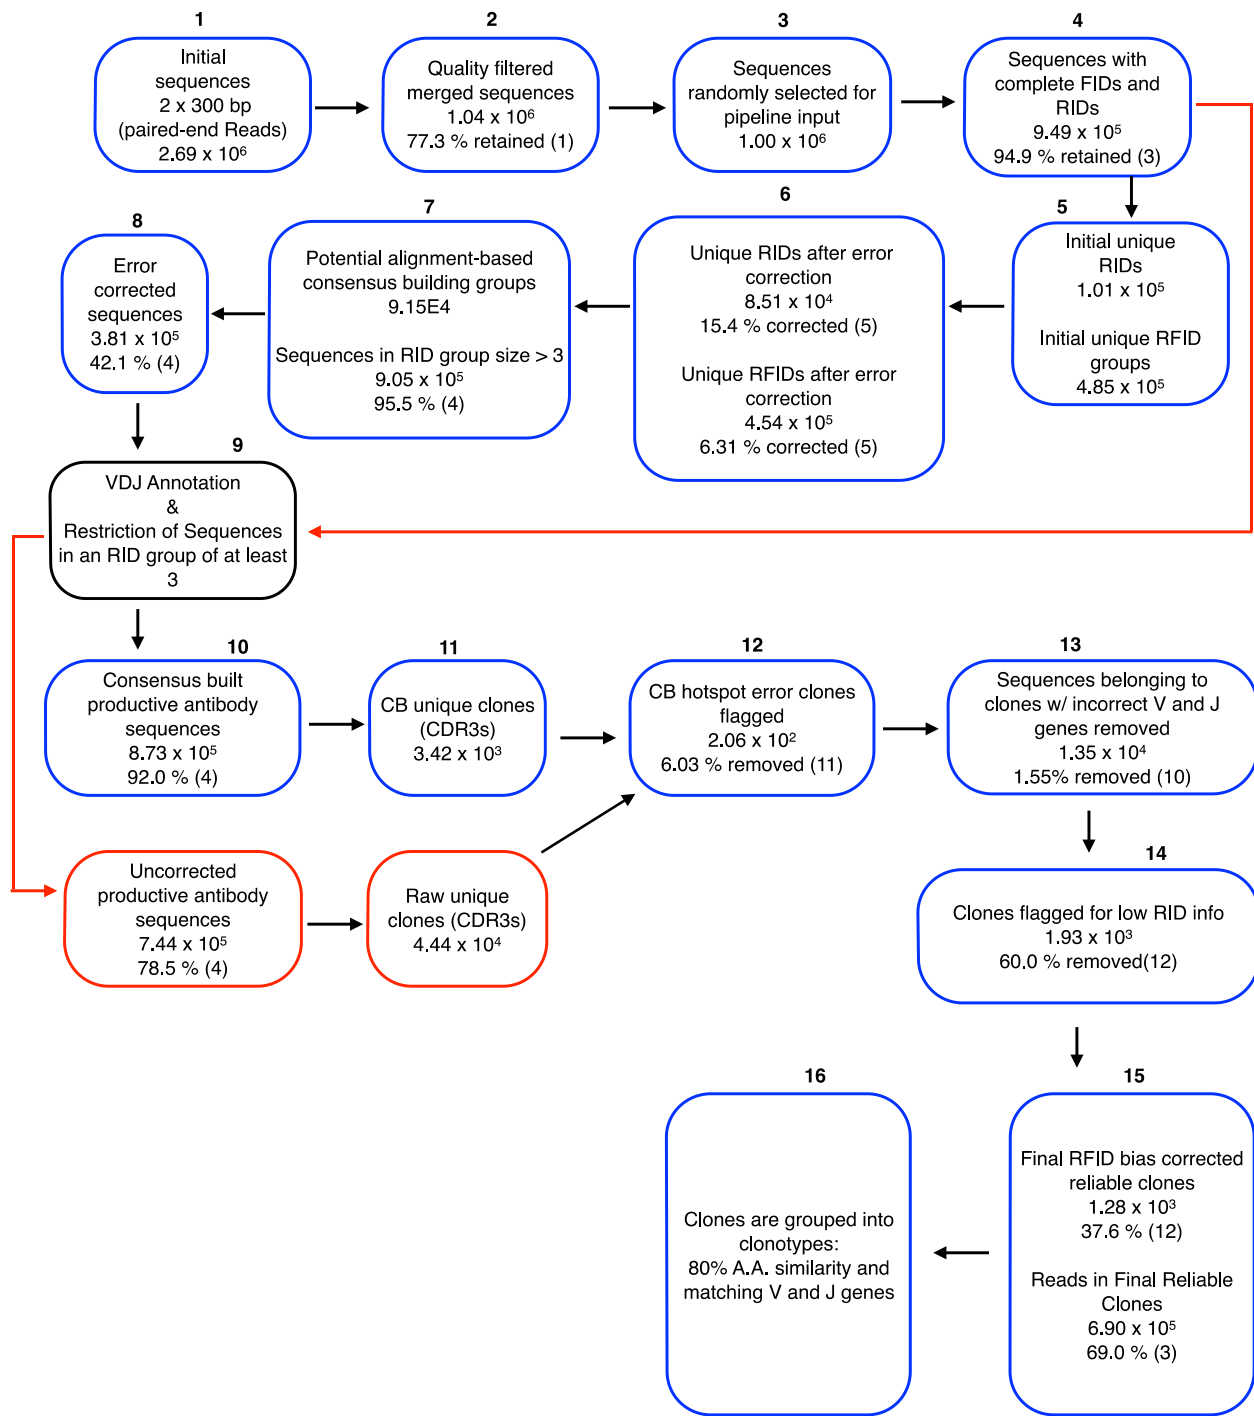

**Fig. S12. Flow chart of multistage error correction pipeline.** Ig-seq read numbers and statistics correspond to representative MAF library preparation from immunized mouse splenic cDNA with ~10% synthetic spike-ins (dataset used is IM\_1a, see table S7).

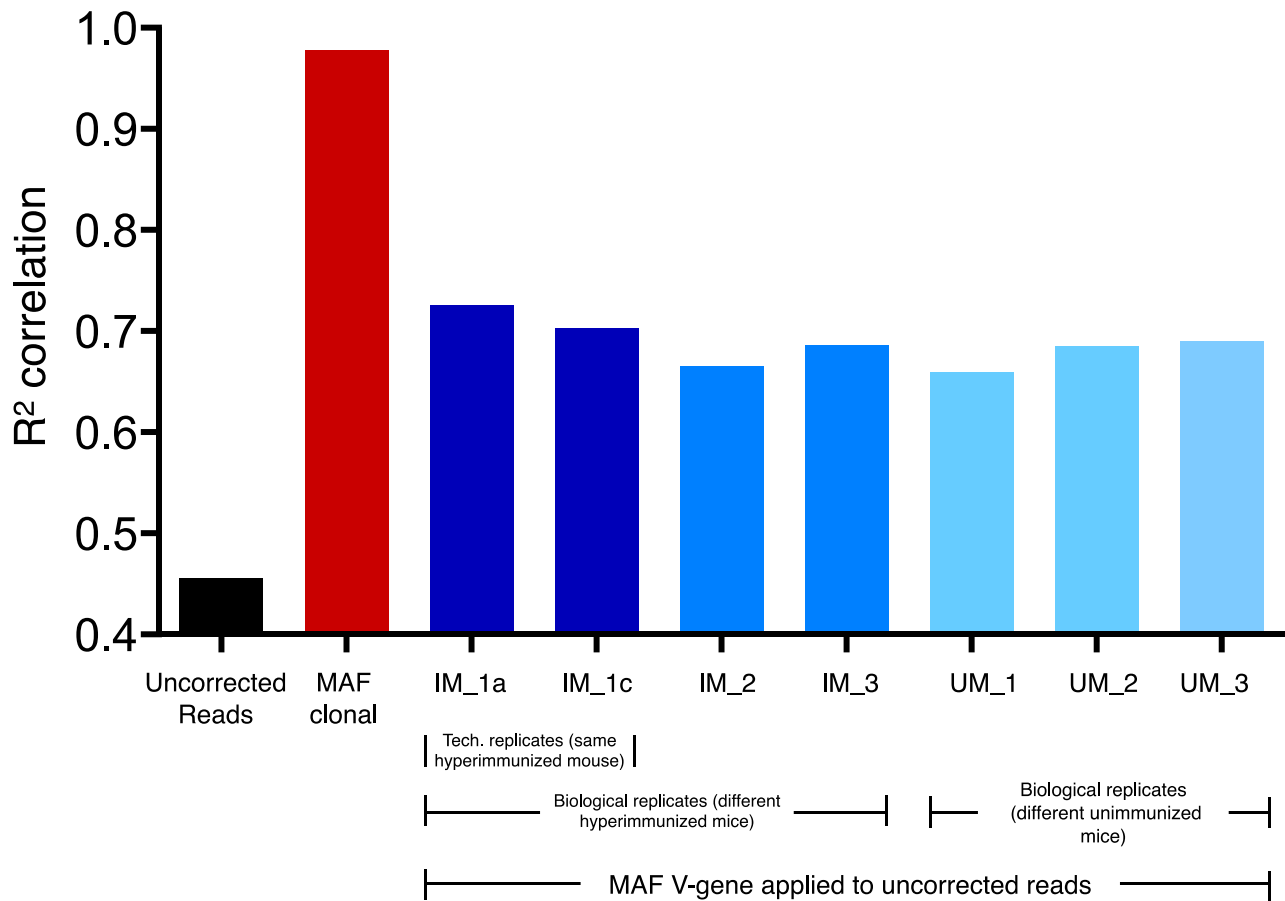

**Fig. S14. Bias correction using MAF V-gene bias factor.** R<sup>2</sup> correlation values of spike-in clonal frequencies with multiplex-PCR versus singleplex-PCR. Evaluation of the MAF V-gene bias factor (F3+) on uncorrected reads from different datasets (see Materials and Methods). Correction of uncorrected reads was performed by using the MAF V-gene bias factors from the same data set (IM\_1a) and a technical replicate (IM\_1b). Correction using MAF V-gene bias factors (from IM\_1a) on biological replicates (separate hyperimmunized mice and untreated mice). Uncorrected reads and MAF clonal bias correction from dataset IM\_1a are shown for reference. Ig-seq data are from library sample preparations of splenic cDNA with synthetic spike-ins from hyperimmunized mice ( $n = 3$ ) and untreated mice ( $n = 3$ ) (datasets used for hyperimmunized are IM\_1a, IM\_1b, IM\_2, IM\_3; datasets used for untreated mice are UM\_1, UM\_2, UM\_3, see table S7). Singleplex spike-in frequencies are mean values obtained from replicate libraries ( $n = 5$ ) generated by singleplex-PCR (see fig. S2 and table S1).

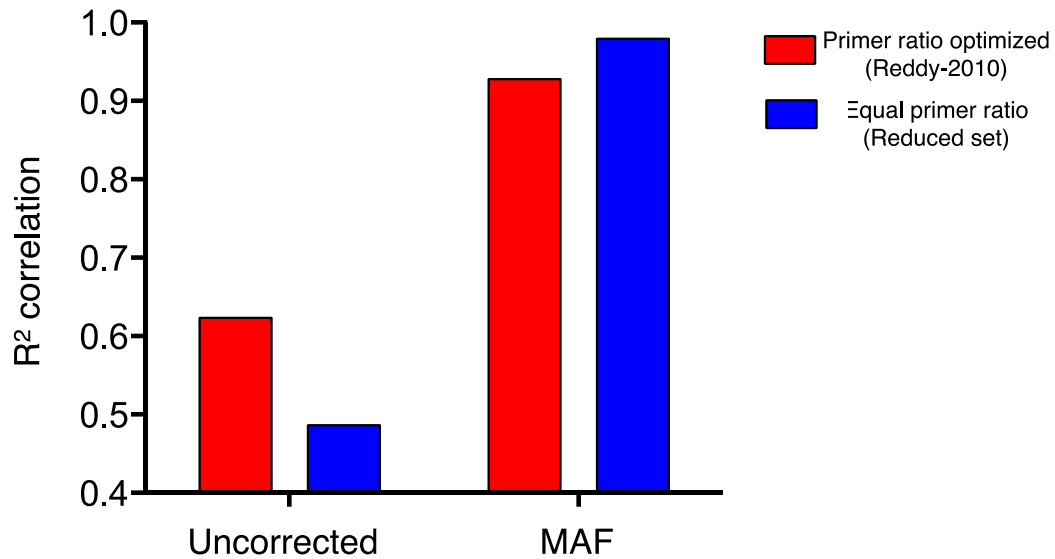

**Fig. S15. Comparison of bias correction with new reduced primer set (TAK) and previously published primer set (Reddy-2010).** R<sup>2</sup> correlation values of spike-in clonal frequencies with multiplex PCR versus singleplex PCR using different primer sets and different bias correction methods. MAF clonal bias correction with TAK primer set achieves the highest accuracy. Ig-seq was performed on samples from library preparation with the same starting material (immunized mouse splenic cDNA with ~10% spike-ins), but using primer set Reddy-2010 or primer set TAK for the multiplex-PCR step. 650k preprocessed sequences for each data set were processed in the MAF bioinformatic pipeline. Datasets used are Reddy-PS-Compare and TAK-PS-Compare, see table S2. A complete list of primer sequences can be found in table S5. Singleplex spike-in frequencies are mean values obtained from replicate libraries ( $n = 5$ ) generated by singleplex-PCR (see fig. S2 and table S1).

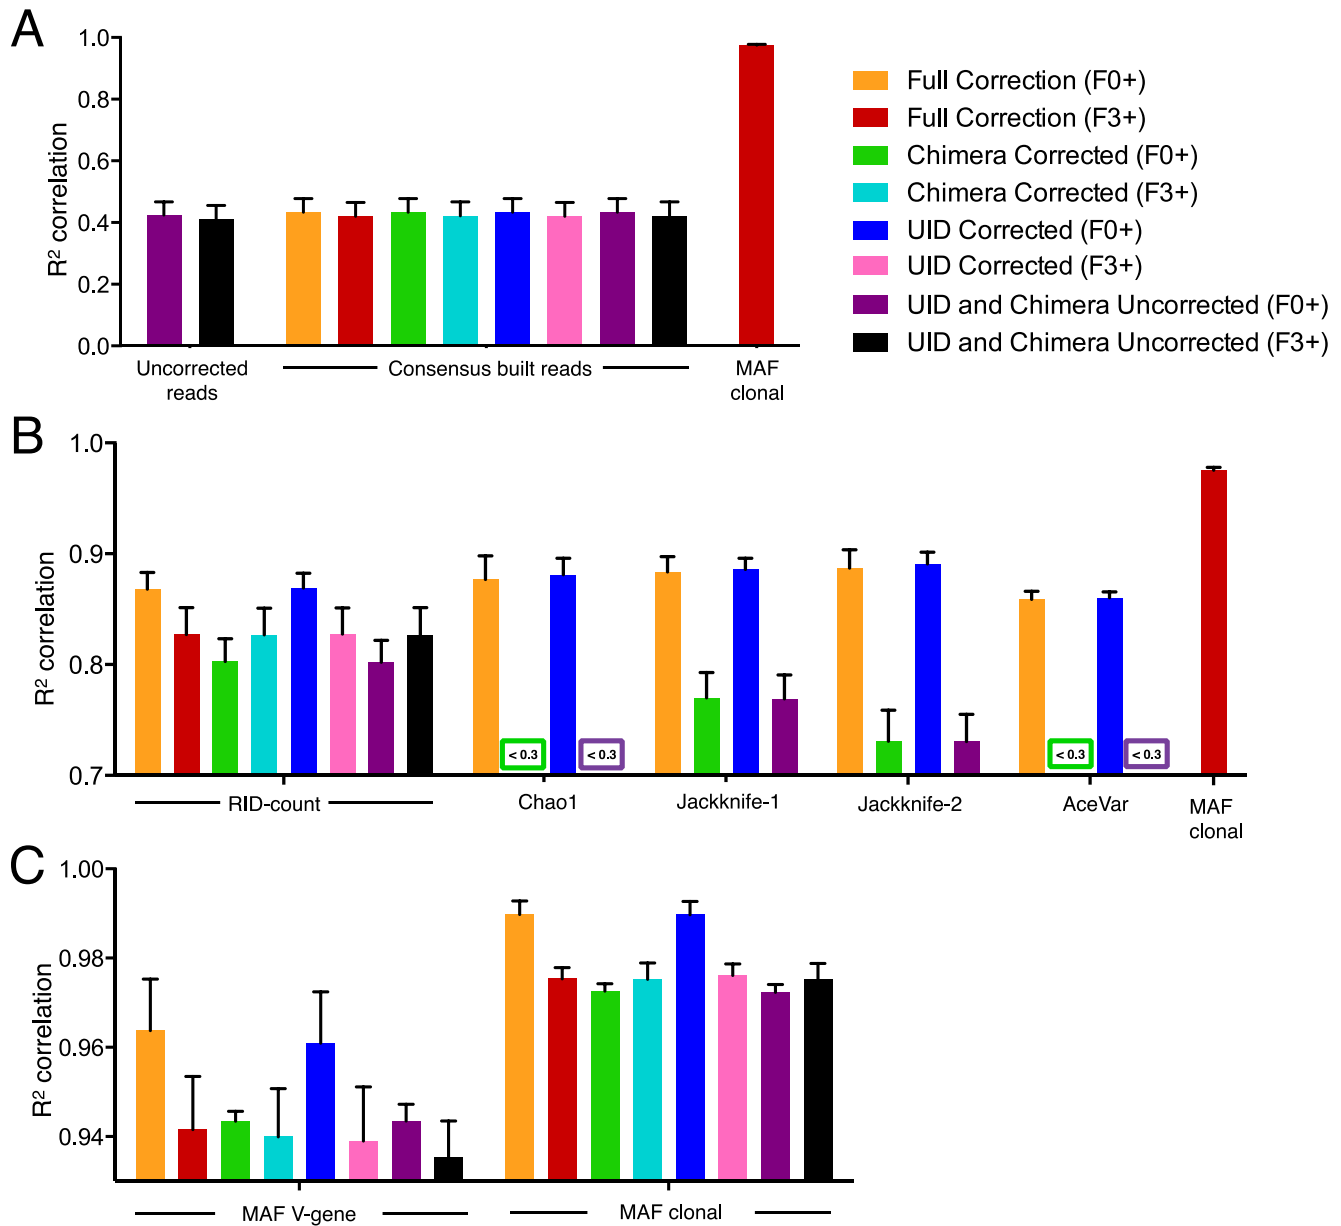

**Fig. S13. Error correction effects on various bias correction methods.**  $R^2$  correlation values of spike-in clonal frequencies from multiplex-PCR versus singleplex-PCR using different versions of bias correction and different stages of error correction and filtering. Based on fig. S12, UID Corrected is stage 6; Chimera Corrected is Stage 13, and Full Correction is product of the full pipeline. Unrestricted (F0+) and restricted (F3+) refers to unfiltered productive sequences and filtering out sequences belonging to RID groupings with less than three reads, respectively. (A) Comparison of read counting based frequencies to MAF clonal. Raw reads are based on non-consensus built Ig-seq data. Consensus built reads correspond to clonal frequencies computed by reads counts after consensus RID building. (B) Comparison of RID counting methods to determine clonal frequencies. RID-count simply computes the RID count based on the total number of unique RIDs associated with a clone. The non-parametric species richness estimators take into account the total number of unique RIDs as well as the number RIDs with very few reads (e.g. a single read (Chao1 and 1st-order Jackknife) or a single and two reads (2nd-order Jackknife). Acevar was computed with  $k=10$  and uses the traditional ACE if  $CV_{rare} \leq 0.8$  or ACE-1 if  $CV_{rare} > 0.8$ . (C) MAF bias factor (FID / RID) was calculated with either median biological V-gene MAF bias factors (MAF V-gene) or individual clonal-based MAF bias factors (MAF Clonal) (see Materials and Methods). In all cases the MAF clonal bias correction achieves the highest accuracy. Also other methods of bias correction such as RID-counting or non-parametric species richness estimators benefit substantially by the MAF error correction pipeline. Ig-seq data are from replicate library sample preparations ( $n = 3$ ) from mouse splenic cDNA with ~10% synthetic spike-ins (data are presented as means  $\pm$  STD and are from replicate datasets IM\_1a, \_1b, \_1c, see table S7). Singleplex spike-in frequencies are mean values obtained from replicate libraries ( $n = 5$ ) generated by singleplex PCR (see fig. S2 and table S1).

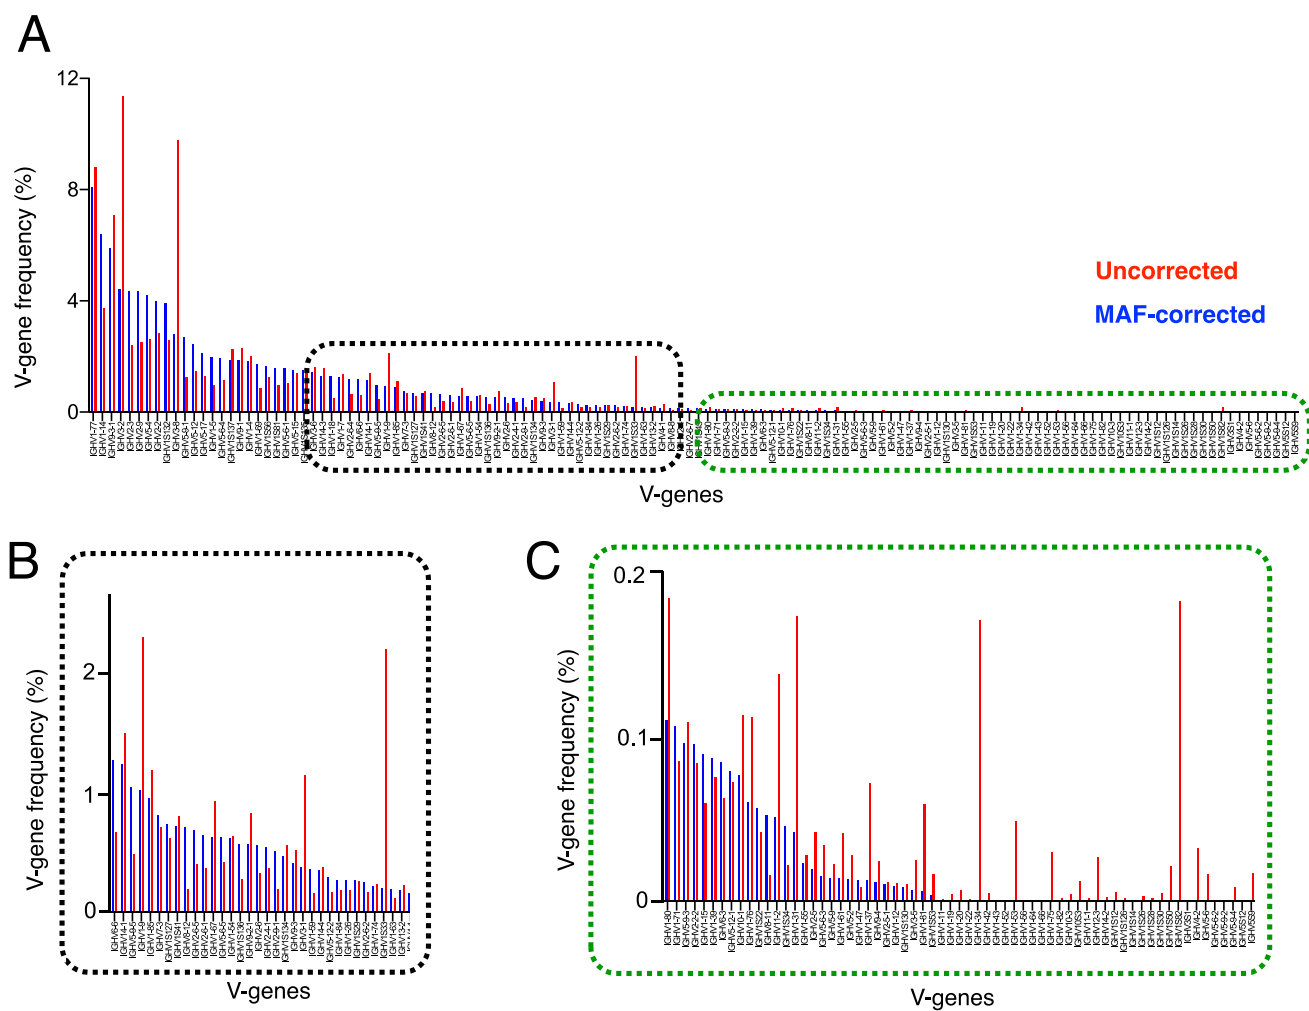

**Fig. S16. Comparison of V-gene (germlines) before and after MAF correction.** Ig-seq read numbers and statistics correspond to representative MAF library preparation from mouse splenic cDNA with synthetic spike-ins (dataset used is IM\_1a, see table S7).

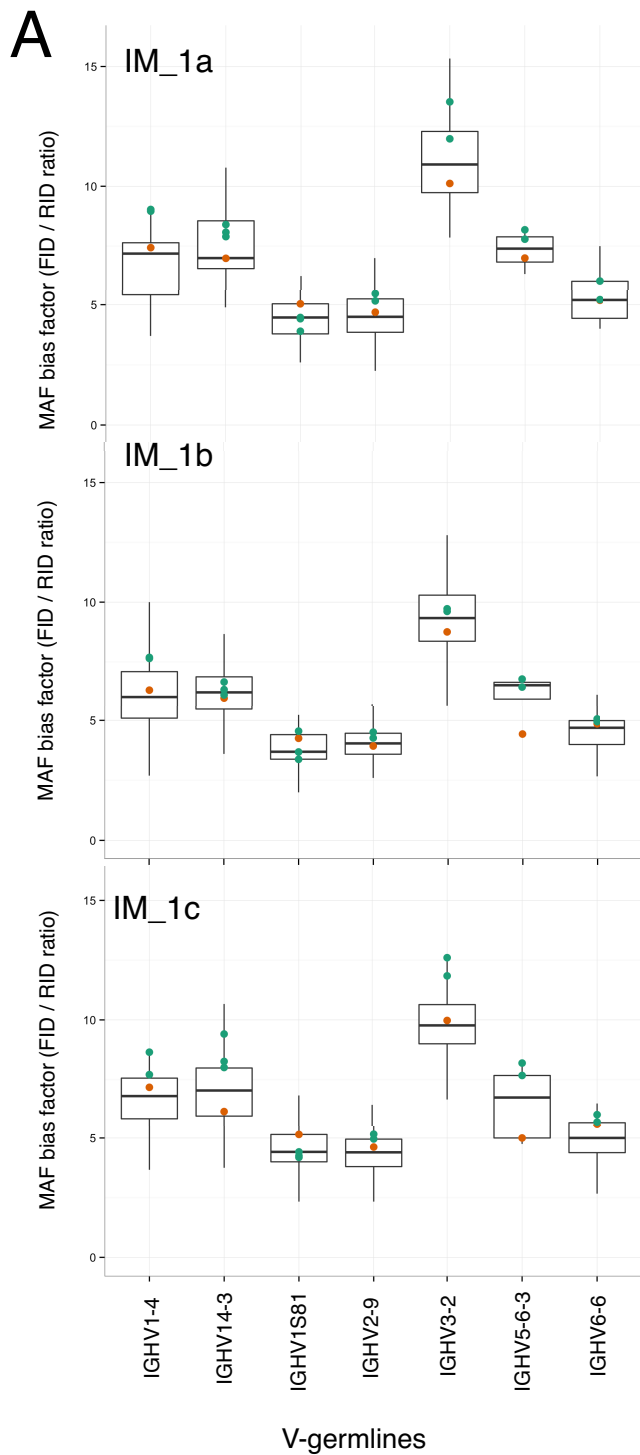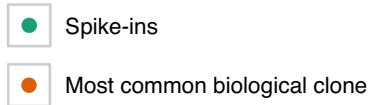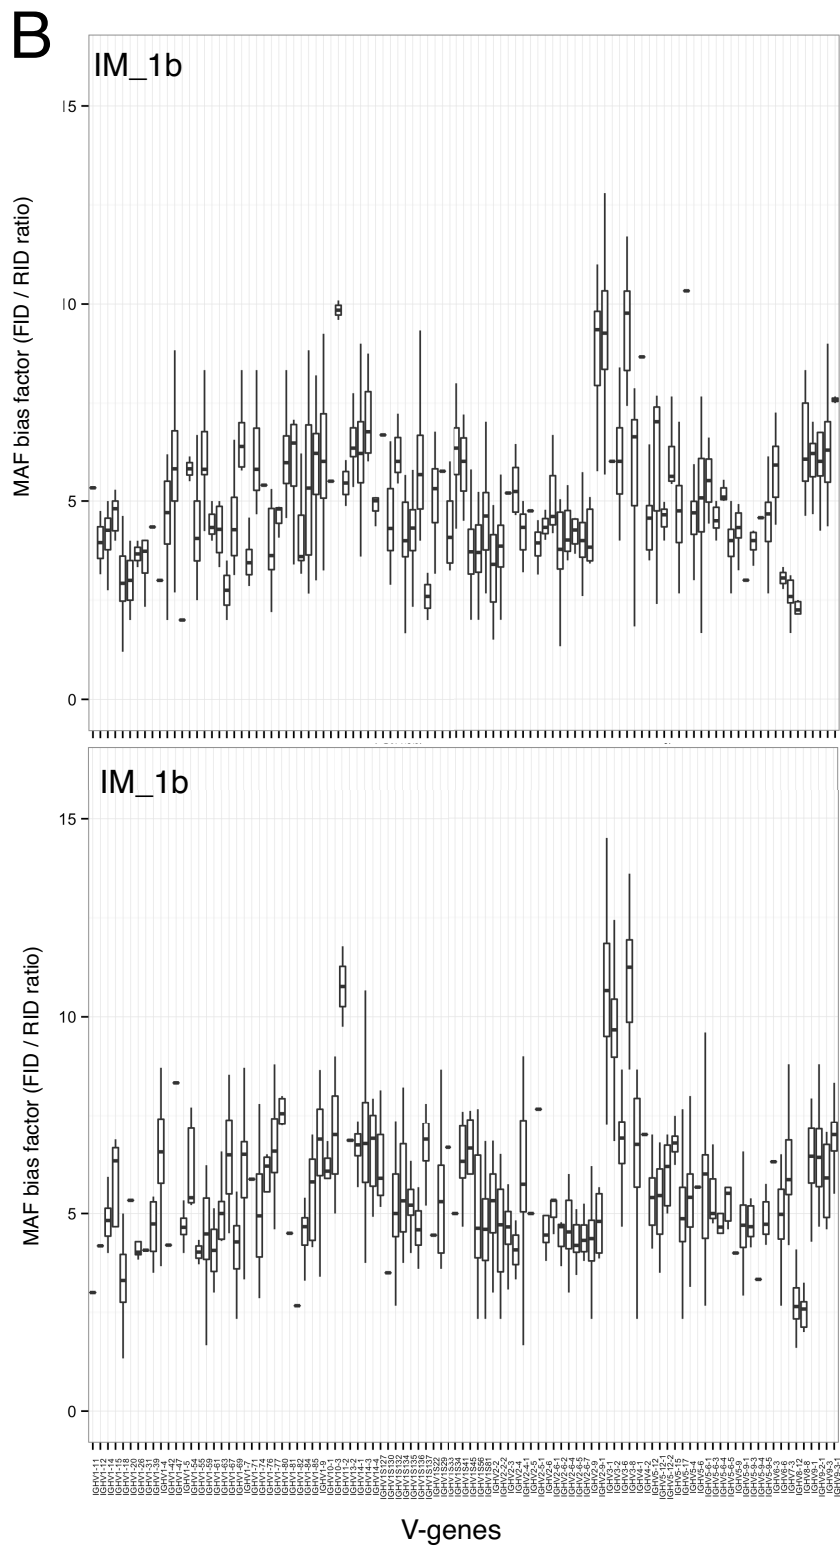



**Fig. S17. The MAF bias factor across V-genes.** (A) The MAF bias factor (FID / RID) of spike-in V-genes or all V-genes (B) shows grouping within and across replicate datasets. MAF bias factor across all V-genes for replicate IM\_1a can be found in Fig. 5E. Ig-seq data are from replicate MAF library sample preparations ( $n = 3$ ) from mouse splenic cDNA with synthetic spike-ins (datasets used were IM\_1a, \_1b, \_1c, see table S7).

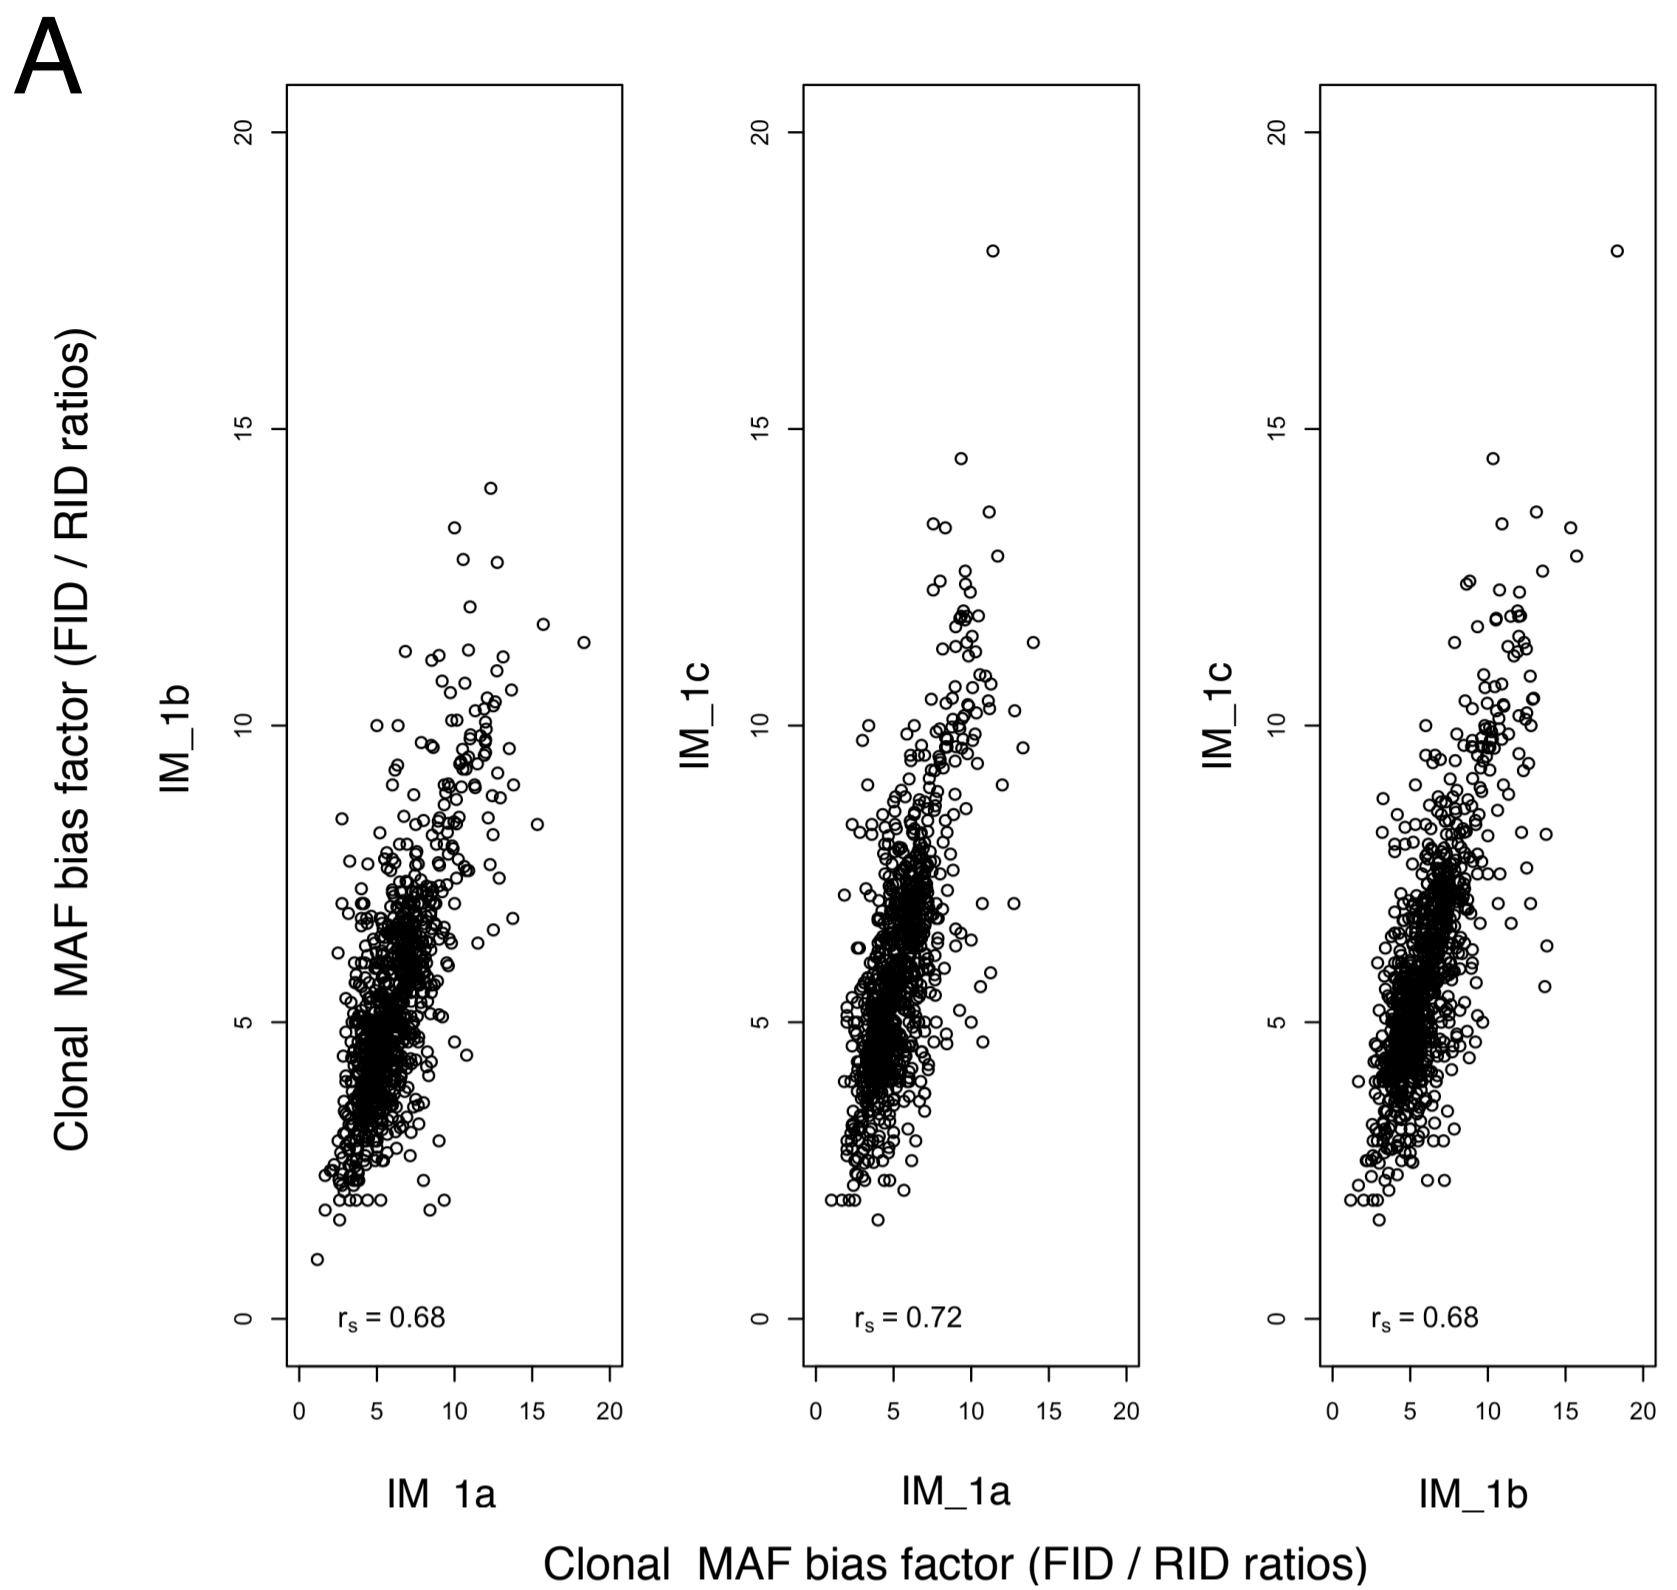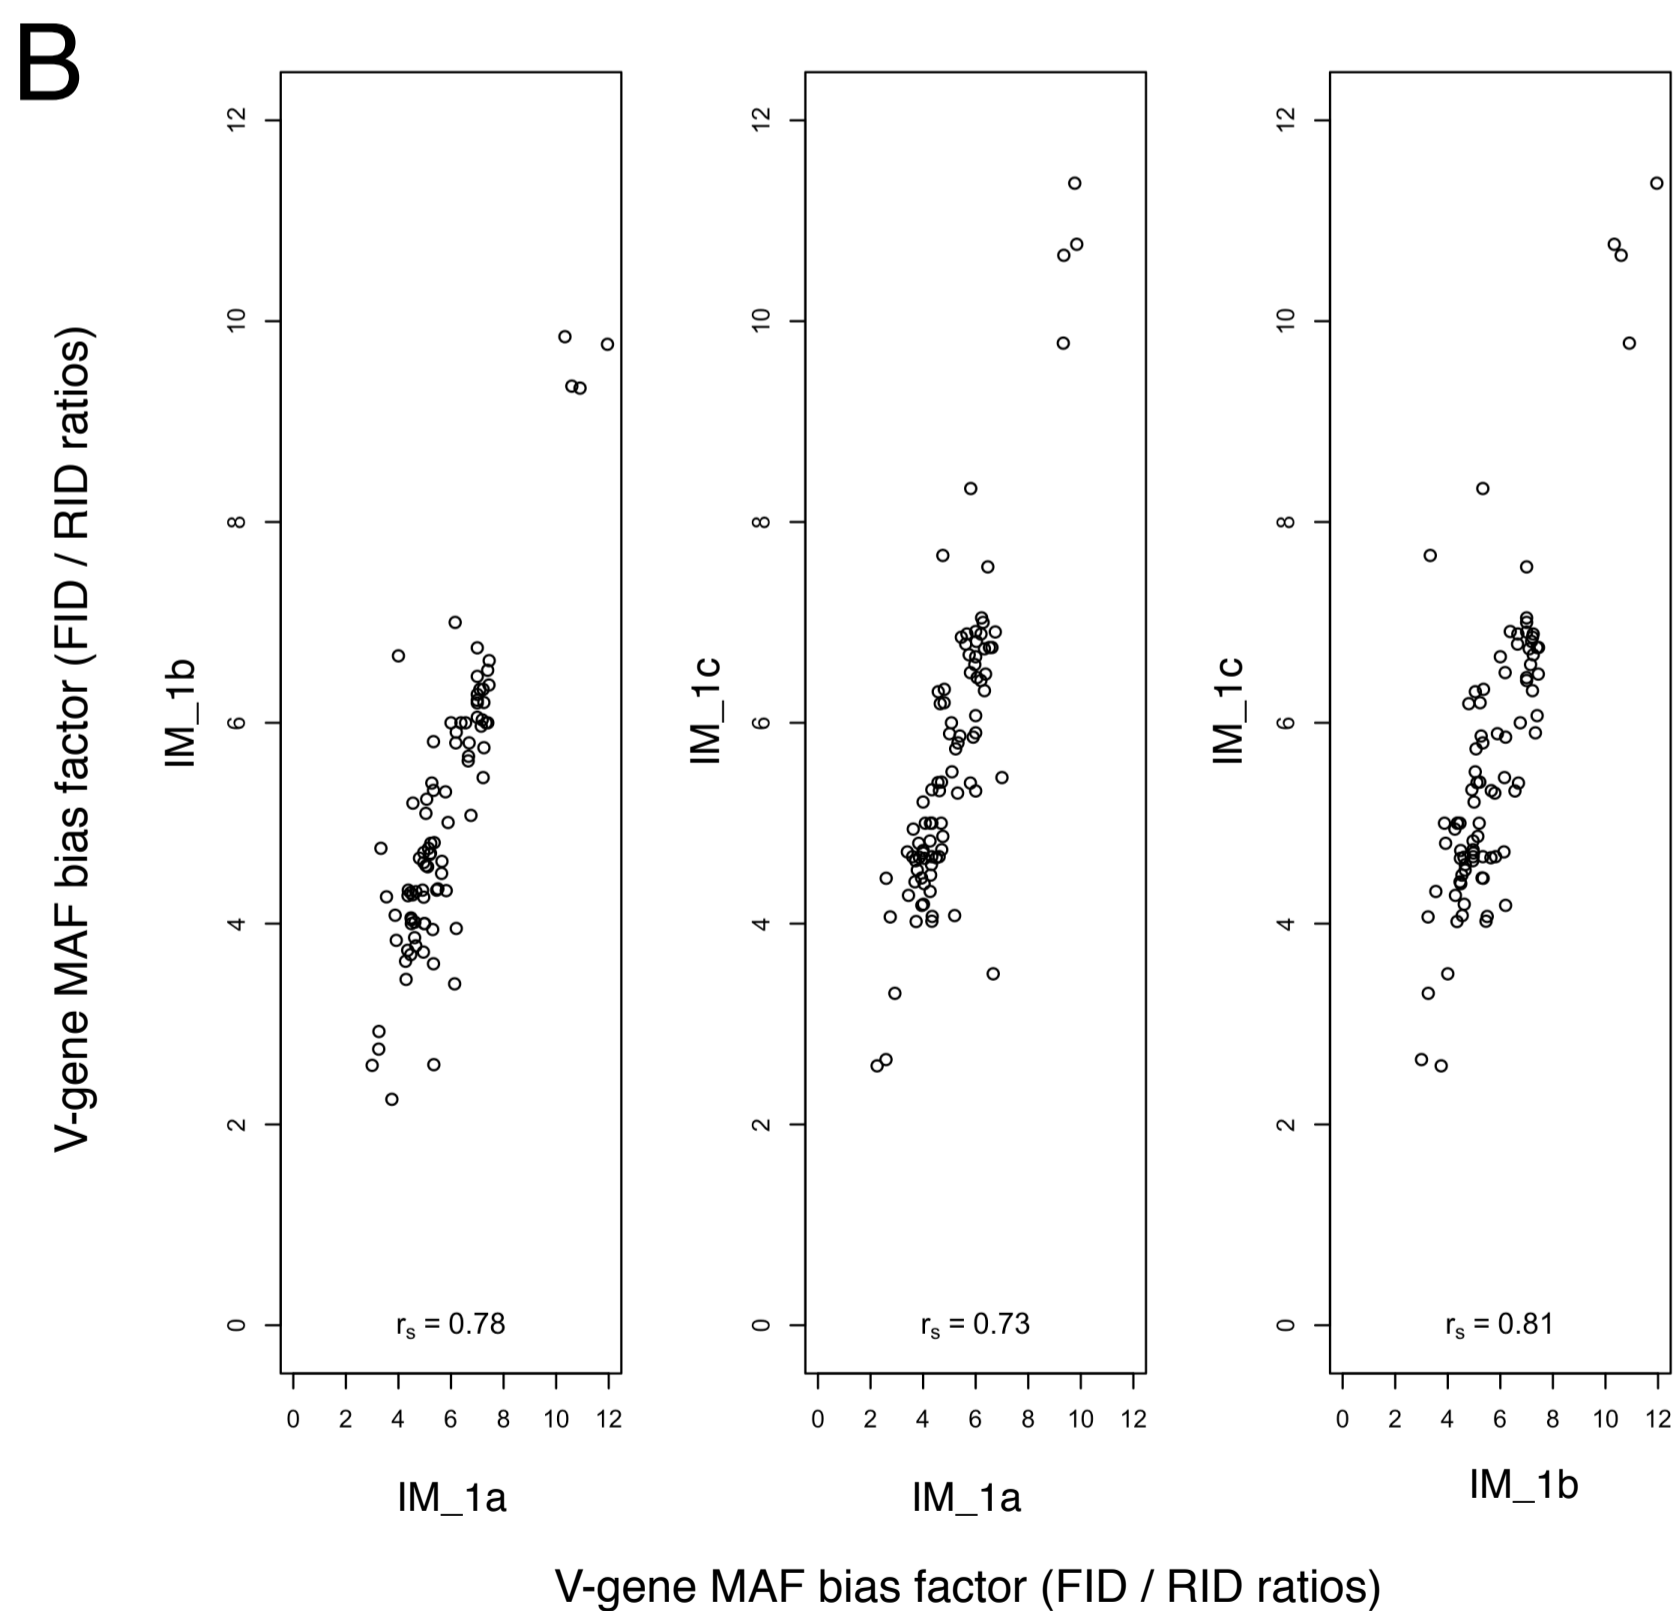

**Supplementary Figure 18** Correlation of MAF bias correction factor across datasets.

(A) Clonal- (B) and V-gene-based MAF bias correction ratio (FID / RID) of MAF replicate library preparations.

Ig-seq data are from replicate MAF library sample preparations ( $n = 3$ ) from mouse splenic cDNA with synthetic spike-ins (datasets used were IM\_1a, \_1b, \_1c, see **Supplementary Table 7**).

**Fig. S18. Correlation of MAF bias correction factor across data sets.** (A) Clonal- (B) and V-gene-based MAF bias factor (FID / RID) of MAF replicate library preparations. Ig-seq data are from replicate MAF library sample preparations ( $n = 3$ ) from mouse splenic cDNA with synthetic spike-ins (datasets used were IM\_1a, \_1b, \_1c, see table S7).

### A Uncorrected (All Factors)

| Parameter Estimates                             |            |           |           |            |
|-------------------------------------------------|------------|-----------|-----------|------------|
| Term                                            | Estimate   | Std Error | ChiSquare | Prob>ChiSq |
| Intercept                                       | -1.4394542 | 0.705801  | 4.16      | 0.0414*    |
| Log(Frequency)                                  | 0.20755495 | 0.1508868 | 1.89      | 0.1690     |
| Log(Frequency)                                  | 0.03175291 | 0.0158905 | 3.99      | 0.0457*    |
| IDI                                             | 0.1679574  | 0.0389365 | 18.61     | <.0001*    |
| SHM (ns)                                        | 0.00496754 | 0.1033273 | 0.00      | 0.9617     |
| Log(Frequency)*Log Frequency                    | 0.00496754 | 0.1033273 | 0.00      | 0.9617     |
| (IDI-46.3583)*(IDI-46.3583)                     | -0.0067587 | 0.0010404 | 42.20     | <.0001*    |
| (SHM (ns)-5.81083)*(SHM (ns)-5.81083)           | -0.0112194 | 0.0032698 | 11.77     | 0.0006*    |
| Log(Frequency)*(IDI-46.3583)                    | -0.0340741 | 0.015162  | 5.05      | 0.0246*    |
| Log(Frequency)*(SHM (ns)-5.81083)               | -0.0181386 | 0.0290339 | 0.39      | 0.5321     |
| (IDI-46.3583)*(SHM (ns)-5.81083)                | -0.002129  | 0.0034566 | 0.38      | 0.5380     |
| Log(Frequency)*(IDI-46.3583)*(SHM (ns)-5.81083) | -0.0011509 | 0.0030145 | 0.15      | 0.7026     |

For log odds of Immunized/Naive

### B MAF-Corrected (All Factors)

| Parameter Estimates                            |            |           |           |            |
|------------------------------------------------|------------|-----------|-----------|------------|
| Term                                           | Estimate   | Std Error | ChiSquare | Prob>ChiSq |
| Intercept                                      | -6.7140791 | 1.0723489 | 39.20     | <.0001*    |
| Log(Frequency)                                 | 1.66414595 | 0.4365349 | 14.53     | 0.0001*    |
| Log(Frequency)                                 | 0.51502137 | 0.0696016 | 54.75     | <.0001*    |
| IDI                                            | 0.23063192 | 0.0939808 | 6.02      | 0.0141*    |
| SHM (ns)                                       | 0.23063192 | 0.0939808 | 6.02      | 0.0141*    |
| Log(Frequency)*Log Frequency                   | -0.2153482 | 0.2025952 | 1.13      | 0.2878     |
| (IDI-15.905)*(IDI-15.905)                      | -0.0036627 | 0.002361  | 2.41      | 0.1208     |
| (SHM (ns)-6.16833)*(SHM (ns)-6.16833)          | -0.0047882 | 0.0048876 | 0.96      | 0.3272     |
| Log(Frequency)*(IDI-15.905)                    | 0.17016319 | 0.053495  | 10.12     | 0.0015*    |
| Log(Frequency)*(SHM (ns)-6.16833)              | 0.11774605 | 0.0657837 | 3.20      | 0.0735     |
| (IDI-15.905)*(SHM (ns)-6.16833)                | 0.02178008 | 0.0135734 | 2.57      | 0.1089     |
| Log(Frequency)*(IDI-15.905)*(SHM (ns)-6.16833) | 0.01713217 | 0.008779  | 3.81      | 0.0510     |

For log odds of Immunized/Naive

### C Uncorrected (Significant Corrected Factors)

| Parameter Estimates          |            |           |           |            |
|------------------------------|------------|-----------|-----------|------------|
| Term                         | Estimate   | Std Error | ChiSquare | Prob>ChiSq |
| Intercept                    | -0.5198762 | 0.4399517 | 1.40      | 0.2373     |
| Log(Frequency)               | 0.08415846 | 0.1012083 | 0.69      | 0.4057     |
| IDI                          | -0.0035351 | 0.0093387 | 0.14      | 0.7050     |
| SHM (ns)                     | 0.13240959 | 0.0196189 | 45.55     | <.0001*    |
| Log(Frequency)*(IDI-46.3583) | 0.00178185 | 0.0080084 | 0.05      | 0.8239     |

For log odds of Immunized/Naive

### D MAF-Corrected (Significant Corrected Factors)

| Parameter Estimates         |            |           |           |            |
|-----------------------------|------------|-----------|-----------|------------|
| Term                        | Estimate   | Std Error | ChiSquare | Prob>ChiSq |
| Intercept                   | -6.4782831 | 0.6953812 | 86.79     | <.0001*    |
| Log(Frequency)              | 2.12712927 | 0.3240819 | 43.08     | <.0001*    |
| IDI                         | 0.56571512 | 0.0649678 | 75.82     | <.0001*    |
| SHM (ns)                    | 0.05215282 | 0.0257225 | 4.11      | 0.0426*    |
| Log(Frequency)*(IDI-15.905) | 0.22640942 | 0.0454441 | 24.82     | <.0001*    |

For log odds of Immunized/Naive

**Fig. S19. Nominal logistic regression modeling based on Ig-seq clonotype measurements.** The parameter estimates for nominal logistic regression models (trained with data sets: IM\_1a, IM\_2, IM\_3, UM\_1, UM\_2, UM3) are shown for factors using uncorrected (A, C) and MAF corrected (B, D) data. First all factors were used in the models (A, B). The models were then reduced to the significant factors determined for the MAF corrected data (C-D). For more information, see **Supplementary Materials and Methods**.

**A** Uncorrected  
All factors modeled

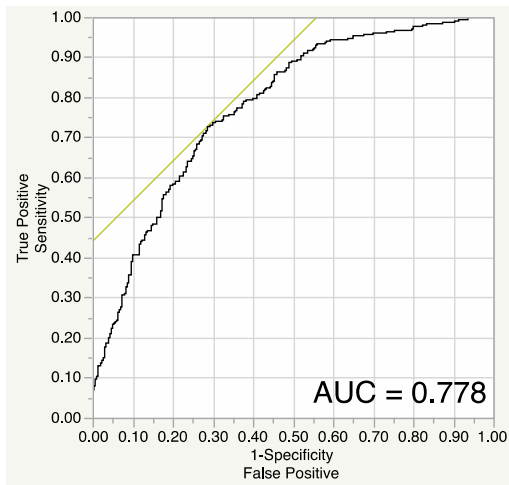

**B** MAF-corrected  
All factors modeled

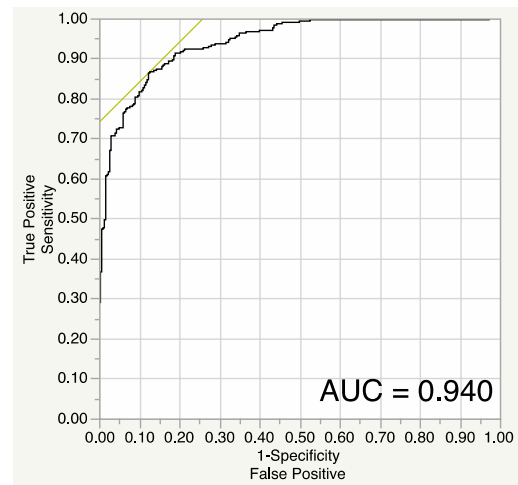

**Fig. S20. Comparison of the sensitivity and specificity of the nominal logistic regression models.** The receiver operating characteristics and area under the curve (AUC) for nominal logistic regression models (trained with data sets: IM\_1a, IM\_2, IM\_3, UM\_1, UM\_2, UM3) are shown for factors using uncorrected (**A**) and MAF-corrected (**B**) data. For more information, see **Supplementary Materials and Methods**.

## A Uncorrected

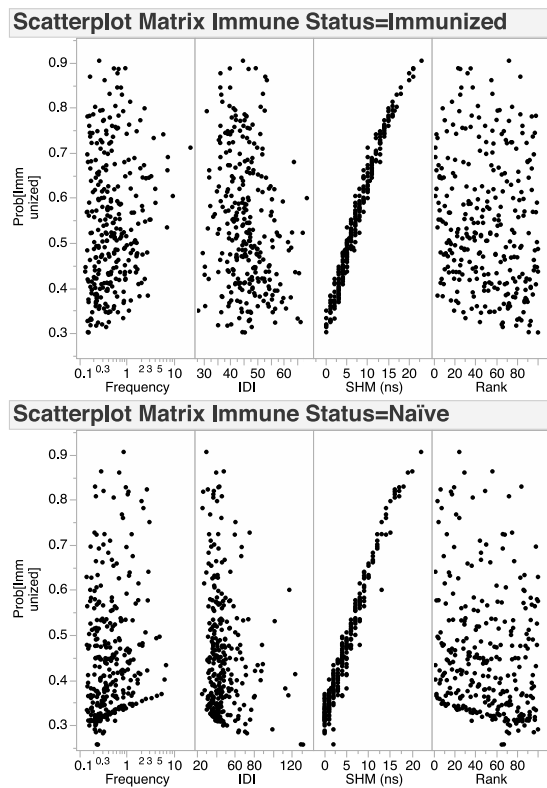

## B MAF-Corrected

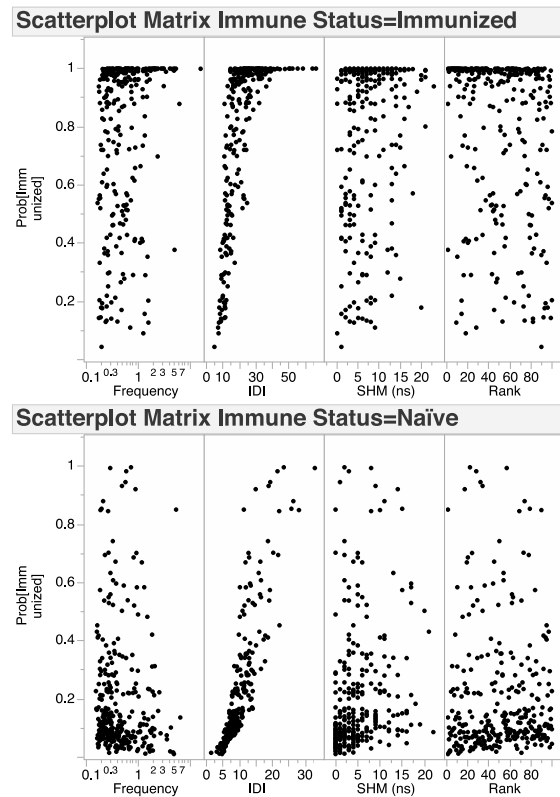

**Fig. S21. Comparison of factor correlations with prediction probabilities of the nominal logistic regression models.**

The probabilities of clonotypes belonging to the hyperimmunized group from the nominal logistic regression models (trained with data sets: IM\_1a, IM\_2, IM\_3, UM\_1, UM\_2, UM3) based on only MAF corrected significant factors are plotted with parameters used in the model (frequency, intraclonotype diversity index (IDI), and median non-silent somatic hypermutations (SHM (ns)), along with the non-model parameter rank based on clonotype frequency. Models from both uncorrected (A) and MAF corrected (B) data are shown. The data sets for hyperimmunized mice (n=3) is shown on top and the data sets for the untreated mice (n=3) is shown on the bottom. For more information see Supplementary Materials and Methods.

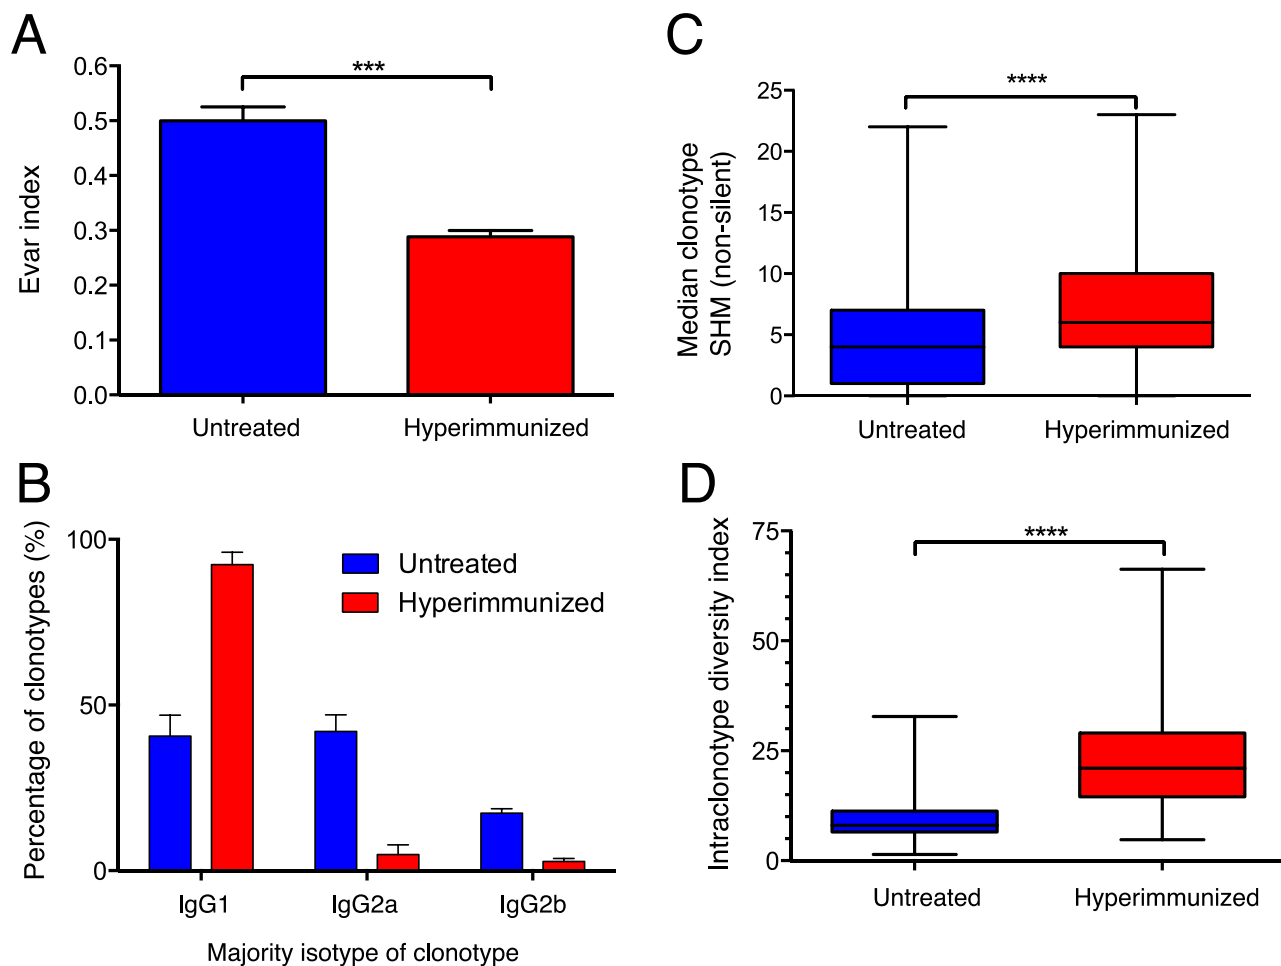

**Fig. S22. Various immune profiling metrics from MAF-corrected Ig-seq data.** Ig-seq data are from library sample preparations of splenic cDNA with synthetic spike-ins from hyperimmunized mice ( $n = 3$ ) and untreated mice ( $n = 3$ ) (datasets used for hyperimmunized are IM\_1a, IM\_2, IM\_3; datasets used for untreated mice are UM\_1, UM\_2, UM\_3, see table S7). Only clonotypes (>80% CDR3 a.a. similarity with matching CDR3 lengths, V and J genes) with the majority of reads being IgG 1, IgG2a, and IgG2b were used for analysis. The Evar index (**A**) was used (top 500 clonotype frequencies of each data set) to determine the extent of polarization. Values closer to 1 represent more evenly distributed clonotype frequencies within a data set, while values closer to 0 represent more skewed clonotype frequencies. The majority isotype of each clonotype (top 500 clonotype frequencies of each data set) was assigned to the clonotype frequency to determine the relative amounts of each isotype in the data sets (**B**). The median non-silent somatic hypermutations (SHM) for each of the top 100 clonotypes (based on frequency) for each data set were compared based on immune status (**C**). The intraclonotype diversity index for each of the top 100 clonotypes (based on frequency) for each data set were compared based on immune status (**D**). P values less than 0.001 and less than 0.0001 are represented by (\*\*\*) and (\*\*\*\*), respectively.

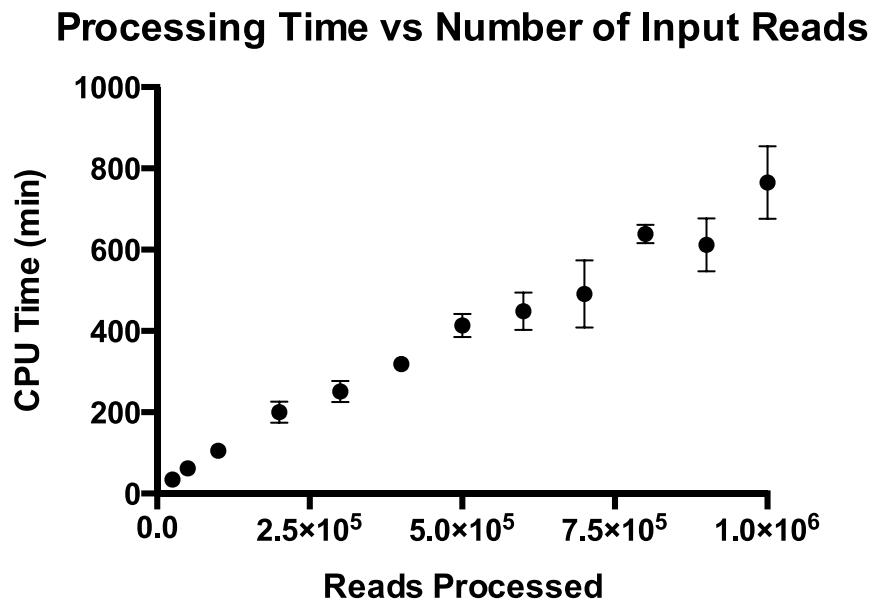

**Fig. S23. Processing time of reads for MAF error and bias correction pipeline.** The steps 2-6 of our MAF error and bias correction pipeline (see Materials and Methods) were integrated into a single workflow, processing time of this workflow scaled directly with the number of sequencing reads. Typically cluster computing enabled parallel processing of several data sets (e.g. 16-18 Ig-seq data sets of  $1 \times 10^6$ ) at one time.



**A**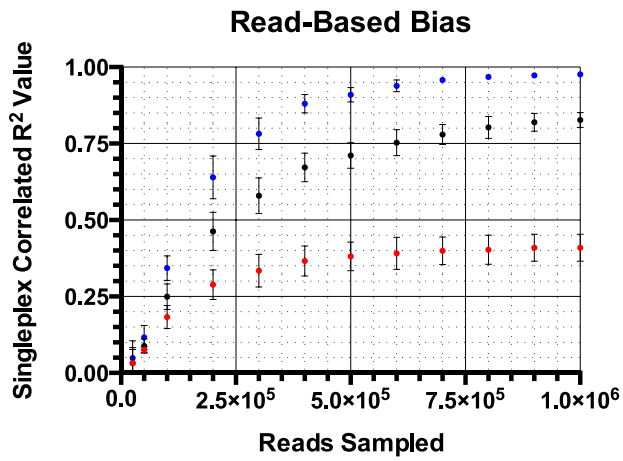

- Uncorrected read based
- RID-count based
- MAF clonal bias correction based

**B**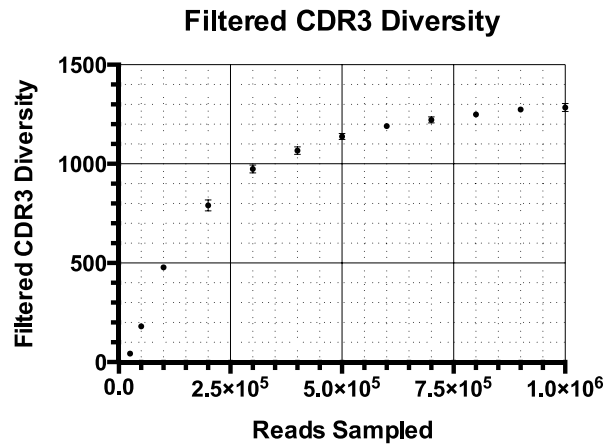

**Fig. S24. Effect of the number of reads analyzed using final MAF sample preparation conditions.** *In silico* random subsampling of CLC Genomics Workbench pre-processing and quality-filtering of merged reads was used to evaluate the effects on (A) clonal frequency bias and (B) filtered clonal diversity. MAF clonal bias corrected data achieved high accuracy (R<sup>2</sup> correlation of spike-in clonal frequencies to singleplex-PCR) with less reads compared to uncorrected or RID-count based data.

| Dataset | Paired-End Reads | Post-CLC Merged Reads | Processed Reads | Productive Reads |
|---------|------------------|-----------------------|-----------------|------------------|
| J1      | 918000           | 373000                | 370000          | 330000           |
| J2      | 1150000          | 477000                | 370000          | 365000           |
| J3      | 1060000          | 423000                | 370000          | 364000           |
| J4      | 1240000          | 510000                | 370000          | 365000           |
| J5      | 1170000          | 458000                | 370000          | 354000           |

**Table S1.** Ig-seq read count statistics for spike-ins following replicate library preparation by singleplex PCR (see fig. S2, B and C). Information on bioinformatic preprocessing and annotation (productive reads) can be found in Materials and Methods.

| Dataset          | Paired-End Reads | Post-CLC Merged Reads | Processed Reads | Productive Reads |
|------------------|------------------|-----------------------|-----------------|------------------|
| Reddy-PS-1       | 1560000          | 585000                | 400000          | 357000           |
| Reddy-PS-2       | 2180000          | 827000                | 400000          | 356000           |
| Reddy-PS-3       | 1090000          | 416000                | 400000          | 346000           |
| Reddy-PS-Compare | 1980000          | 749000                | 650000          | 522000           |
| TAK-PS-Compare   | 1730000          | 672000                | 650000          | 583000           |

**Table S2. Ig-seq read count statistics following MAF library preparation by multiplex PCR (See Fig. 2A).** Datasets Reddy-PS-1, -2, -3 were from replicate MAF library preparation from the same starting material (immunized mouse splenic cDNA with ~10% spike-ins) using multiplex PCR step with primer set Reddy-2010 (described previously in Ref. 16). Datasets Reddy-PS-Compare and TAK-PS-Compare were from library preparation starting from the same starting material (immunized mouse splenic cDNA with ~10% spike-ins), but using primer set Reddy-2010 or newly designed reduced primer set TAK for the multiplex PCR step. A complete list of primer sequences can be found in table S5. Information on bioinformatic preprocessing and annotation (productive reads) can be found in Materials and Methods.

| <b>Annotation type</b> | <b>Comparison with IMGT HighV-Quest</b> |
|------------------------|-----------------------------------------|
| V Gene Matches         | 0.998                                   |
| J Gene Matches         | 0.999                                   |
| CDR3 Matches           | 0.998                                   |
| SHM Matches            | 0.99                                    |
| Nonsilent SHM Matches  | 0.977                                   |

**Table S3. A comparison of the VDJ annotation tool used in this study** (modified from Laserson *et al.* (12)) with IMGT HighV-Quest. The same NGS data was used for both annotation tools, corresponding to 500,000 sequences (randomly selected) from dataset IM\_2, see table S7. Additional information on bioinformatic preprocessing and VDJ annotation can be found in Materials and Methods.

| Dataset | Paired-End Reads | Post-CLC Merged Reads | Processed Reads |
|---------|------------------|-----------------------|-----------------|
| S1      | 2400000          | 1060000               | 3 levels        |
| S2      | 394000           | 1750000               | 3 levels        |
| S3      | 2500000          | 1110000               | 3 levels        |
| S4      | 3210000          | 1440000               | 3 levels        |
| S5      | 2850000          | 1270000               | 3 levels        |
| S6      | 2940000          | 1320000               | 3 levels        |
| S7      | 3810000          | 1710000               | 3 levels        |
| S8      | 3270000          | 1460000               | 3 levels        |
| S9      | 2540000          | 1140000               | 3 levels        |
| S10     | 3210000          | 1430000               | 3 levels        |
| S11     | 2530000          | 1110000               | 3 levels        |
| S12     | 2390000          | 1070000               | 3 levels        |
| S13     | 2870000          | 1270000               | 3 levels        |
| S14     | 2200000          | 992000                | 3 levels        |
| S15     | 2430000          | 1090000               | 3 levels        |
| S16     | 787000           | 336000                | 1 levels        |

**Table. S4.** Ig-seq read count statistics for DoE for library preparation optimization. Information on bioinformatic preprocessing and annotation (productive reads) can be found in Materials and Methods. For more information on DoE see Supplementary Materials and Methods.

**Table S5. A complete list of primers and sequences used in this study.**

MAF Primers

| Primer Name    | Sequence (5' - 3')                                                   | Function                                     |
|----------------|----------------------------------------------------------------------|----------------------------------------------|
| TAK_402        | TTGGCACCCGAGAATTCCTACTGHHHHHACAHHHHHACAHHHHNATTCCTTGACCAGGCA         | Mouse IgG1.2a,2b,2c RT Primer (mixed at 95%) |
| TAK_403        | TTGGCACCCGAGAATTCCTACTGHHHHHACAHHHHHACAHHHHNATTCCTTGACAAGGCATCC      | Mouse IgG3 RT Primer (mixed at 5%)           |
| TAK_472        | CGTTCAGAGTCTACAGTCCGACGATCHHHHACHHHHACHHHNGCAGCGTCCAGTCACTCAGTTACT*C | Singleplex Spike-In 1st-Step Forward Primer  |
| TAK_423        | ACTGGAGTTCCTTGGCACCCGAGAATTCCTACT*G                                  | 1st-Step PCR Reverse Primer                  |
| TAK_424        | AATGATACGGGACCCACCGAGATCTACACGTTGAGAGTCTACAGTCCGACGAT*C              | 2nd-Step PCR Forward primer                  |
| TAK_531_IDX_1  | CAAGCAGAAGACGGCATAACGAGATCGTGTGACTGGAGTTCCTTGGCACCC*G                | 2nd-Step Reverse Primer (Illumina Index 1)   |
| TAK_532_IDX_2  | CAAGCAGAAGACGGCATAACGAGATACATCGGTGACTGGAGTTCCTTGGCACCC*G             | 2nd-Step Reverse Primer (Illumina Index 2)   |
| TAK_533_IDX_3  | CAAGCAGAAGACGGCATAACGAGATGCCTAAGTACTGGAGTTCCTTGGCACCC*G              | 2nd-Step Reverse Primer (Illumina Index 3)   |
| TAK_534_IDX_4  | CAAGCAGAAGACGGCATAACGAGATTGGTCACTGACTGGAGTTCCTTGGCACCC*G             | 2nd-Step Reverse Primer (Illumina Index 4)   |
| TAK_535_IDX_5  | CAAGCAGAAGACGGCATAACGAGATCACTGTGTGACTGGAGTTCCTTGGCACCC*G             | 2nd-Step Reverse Primer (Illumina Index 5)   |
| TAK_536_IDX_6  | CAAGCAGAAGACGGCATAACGAGATTTGGCGTACTGGAGTTCCTTGGCACCC*G               | 2nd-Step Reverse Primer (Illumina Index 6)   |
| TAK_537_IDX_7  | CAAGCAGAAGACGGCATAACGAGATGATCTGGACTGGAGTTCCTTGGCACCC*G               | 2nd-Step Reverse Primer (Illumina Index 7)   |
| TAK_538_IDX_8  | CAAGCAGAAGACGGCATAACGAGATCAAGTGTGACTGGAGTTCCTTGGCACCC*G              | 2nd-Step Reverse Primer (Illumina Index 8)   |
| TAK_539_IDX_9  | CAAGCAGAAGACGGCATAACGAGATCTGATCGTACTGGAGTTCCTTGGCACCC*G              | 2nd-Step Reverse Primer (Illumina Index 9)   |
| TAK_540_IDX_10 | CAAGCAGAAGACGGCATAACGAGATAAGCTAGTACTGGAGTTCCTTGGCACCC*G              | 2nd-Step Reverse Primer (Illumina Index 10)  |
| TAK_541_IDX_11 | CAAGCAGAAGACGGCATAACGAGATGTAGCCGTGACTGGAGTTCCTTGGCACCC*G             | 2nd-Step Reverse Primer (Illumina Index 11)  |
| TAK_542_IDX_12 | CAAGCAGAAGACGGCATAACGAGATTACAAGGTGACTGGAGTTCCTTGGCACCC*G             | 2nd-Step Reverse Primer (Illumina Index 12)  |
| TAK_543_IDX_13 | CAAGCAGAAGACGGCATAACGAGATTTGACTGTGACTGGAGTTCCTTGGCACCC*G             | 2nd-Step Reverse Primer (Illumina Index 13)  |
| TAK_544_IDX_14 | CAAGCAGAAGACGGCATAACGAGATGGAACGTGACTGGAGTTCCTTGGCACCC*G              | 2nd-Step Reverse Primer (Illumina Index 14)  |
| TAK_545_IDX_15 | CAAGCAGAAGACGGCATAACGAGATTGACATGTGACTGGAGTTCCTTGGCACCC*G             | 2nd-Step Reverse Primer (Illumina Index 15)  |
| TAK_546_IDX_16 | CAAGCAGAAGACGGCATAACGAGATGGACGGGTGACTGGAGTTCCTTGGCACCC*G             | 2nd-Step Reverse Primer (Illumina Index 16)  |
| TAK_547_IDX_17 | CAAGCAGAAGACGGCATAACGAGATCTCTACTGTGACTGGAGTTCCTTGGCACCC*G            | 2nd-Step Reverse Primer (Illumina Index 17)  |
| TAK_548_IDX_18 | CAAGCAGAAGACGGCATAACGAGATGCGGACGTGACTGGAGTTCCTTGGCACCC*G             | 2nd-Step Reverse Primer (Illumina Index 18)  |
| TAK_549_IDX_19 | CAAGCAGAAGACGGCATAACGAGATTTTCACTGTGACTGGAGTTCCTTGGCACCC*G            | 2nd-Step Reverse Primer (Illumina Index 19)  |
| TAK_550_IDX_20 | CAAGCAGAAGACGGCATAACGAGATGGCCACGTGACTGGAGTTCCTTGGCACCC*G             | 2nd-Step Reverse Primer (Illumina Index 20)  |
| TAK_551_IDX_21 | CAAGCAGAAGACGGCATAACGAGATCGAATCGTACTGGAGTTCCTTGGCACCC*G              | 2nd-Step Reverse Primer (Illumina Index 21)  |
| TAK_552_IDX_22 | CAAGCAGAAGACGGCATAACGAGATCGTACGGTACTGGAGTTCCTTGGCACCC*G              | 2nd-Step Reverse Primer (Illumina Index 22)  |
| TAK_553_IDX_23 | CAAGCAGAAGACGGCATAACGAGATCCACTCGTACTGGAGTTCCTTGGCACCC*G              | 2nd-Step Reverse Primer (Illumina Index 23)  |
| TAK_554_IDX_24 | CAAGCAGAAGACGGCATAACGAGATGCTACCGTACTGGAGTTCCTTGGCACCC*G              | 2nd-Step Reverse Primer (Illumina Index 24)  |
| TAK_425_IDX_25 | CAAGCAGAAGACGGCATAACGAGATatcagTGTGACTGGAGTTCCTTGGCACCC*G             | 2nd-Step Reverse Primer (Illumina Index 25)  |
| TAK_426_IDX_26 | CAAGCAGAAGACGGCATAACGAGATgctcatGTGACTGGAGTTCCTTGGCACCC*G             | 2nd-Step Reverse Primer (Illumina Index 26)  |
| TAK_427_IDX_27 | CAAGCAGAAGACGGCATAACGAGATaggaatGTGACTGGAGTTCCTTGGCACCC*G             | 2nd-Step Reverse Primer (Illumina Index 27)  |
| TAK_428_IDX_28 | CAAGCAGAAGACGGCATAACGAGATcttttGTGACTGGAGTTCCTTGGCACCC*G              | 2nd-Step Reverse Primer (Illumina Index 28)  |
| TAK_429_IDX_29 | CAAGCAGAAGACGGCATAACGAGATTAGTTGGTACTGGAGTTCCTTGGCACCC*G              | 2nd-Step Reverse Primer (Illumina Index 29)  |
| TAK_430_IDX_30 | CAAGCAGAAGACGGCATAACGAGATCCGGTGGTACTGGAGTTCCTTGGCACCC*G              | 2nd-Step Reverse Primer (Illumina Index 30)  |
| TAK_431_IDX_31 | CAAGCAGAAGACGGCATAACGAGATATCGTGGTACTGGAGTTCCTTGGCACCC*G              | 2nd-Step Reverse Primer (Illumina Index 31)  |
| TAK_432_IDX_32 | CAAGCAGAAGACGGCATAACGAGATTGAGTGGTACTGGAGTTCCTTGGCACCC*G              | 2nd-Step Reverse Primer (Illumina Index 32)  |
| TAK_433_IDX_33 | CAAGCAGAAGACGGCATAACGAGATCCCTGGTACTGGAGTTCCTTGGCACCC*G               | 2nd-Step Reverse Primer (Illumina Index 33)  |
| TAK_434_IDX_34 | CAAGCAGAAGACGGCATAACGAGATGCCATGGTACTGGAGTTCCTTGGCACCC*G              | 2nd-Step Reverse Primer (Illumina Index 34)  |
| TAK_435_IDX_35 | CAAGCAGAAGACGGCATAACGAGATAAAATGGTACTGGAGTTCCTTGGCACCC*G              | 2nd-Step Reverse Primer (Illumina Index 35)  |
| TAK_436_IDX_36 | CAAGCAGAAGACGGCATAACGAGATTGTTGGTACTGGAGTTCCTTGGCACCC*G               | 2nd-Step Reverse Primer (Illumina Index 36)  |
| TAK_437_IDX_37 | CAAGCAGAAGACGGCATAACGAGATTTCCGGTACTGGAGTTCCTTGGCACCC*G               | 2nd-Step Reverse Primer (Illumina Index 37)  |
| TAK_438_IDX_38 | CAAGCAGAAGACGGCATAACGAGATAGCTAGGTACTGGAGTTCCTTGGCACCC*G              | 2nd-Step Reverse Primer (Illumina Index 38)  |
| TAK_439_IDX_39 | CAAGCAGAAGACGGCATAACGAGATGTATAGGTACTGGAGTTCCTTGGCACCC*G              | 2nd-Step Reverse Primer (Illumina Index 39)  |
| TAK_440_IDX_40 | CAAGCAGAAGACGGCATAACGAGATCTGAGGTACTGGAGTTCCTTGGCACCC*G               | 2nd-Step Reverse Primer (Illumina Index 40)  |
| TAK_441_IDX_41 | CAAGCAGAAGACGGCATAACGAGATGTCTGCTGACTGGAGTTCCTTGGCACCC*G              | 2nd-Step Reverse Primer (Illumina Index 41)  |
| TAK_442_IDX_42 | CAAGCAGAAGACGGCATAACGAGATCGATTGACTGGAGTTCCTTGGCACCC*G                | 2nd-Step Reverse Primer (Illumina Index 42)  |
| TAK_443_IDX_43 | CAAGCAGAAGACGGCATAACGAGATGCTGTAGTACTGGAGTTCCTTGGCACCC*G              | 2nd-Step Reverse Primer (Illumina Index 43)  |
| TAK_444_IDX_44 | CAAGCAGAAGACGGCATAACGAGATTTATAGTACTGGAGTTCCTTGGCACCC*G               | 2nd-Step Reverse Primer (Illumina Index 44)  |
| TAK_445_IDX_45 | CAAGCAGAAGACGGCATAACGAGATGAATGAGTACTGGAGTTCCTTGGCACCC*G              | 2nd-Step Reverse Primer (Illumina Index 45)  |
| TAK_446_IDX_46 | CAAGCAGAAGACGGCATAACGAGATTCGGGAGTACTGGAGTTCCTTGGCACCC*G              | 2nd-Step Reverse Primer (Illumina Index 46)  |
| TAK_447_IDX_47 | CAAGCAGAAGACGGCATAACGAGATCTCCAGTACTGGAGTTCCTTGGCACCC*G               | 2nd-Step Reverse Primer (Illumina Index 47)  |
| TAK_448_IDX_48 | CAAGCAGAAGACGGCATAACGAGATTGCCAGTACTGGAGTTCCTTGGCACCC*G               | 2nd-Step Reverse Primer (Illumina Index 48)  |

**Table S5. A complete list of primers and sequences used in this study. (cont.)**

Reddy-2010 multiplex-PCR primer set for mouse  $V_H$   
MAF-modified regions

| Primer Name | Sequence (5' - 3')                                                          | Function                     | Ratio in primer set |
|-------------|-----------------------------------------------------------------------------|------------------------------|---------------------|
| TAK_404     | CGTTCAGAGTTCTACAGTCCGACGATCHHHHACHHH<br>HACHHHNGCAG GAKGTRMAGCTTCAGGAGT*C   | FID-Multiplex Forward Primer | 0.076               |
| TAK_405     | CGTTCAGAGTTCTACAGTCCGACGATCHHHHACHHH<br>HACHHHNGCAG GAGGTBCAGCTBCAGCAGT*C   | FID-Multiplex Forward Primer | 0.076               |
| TAK_406     | CGTTCAGAGTTCTACAGTCCGACGATCHHHHACHHH<br>HACHHHNGCAG CAGGTGCAGCTGAAGSAST*C   | FID-Multiplex Forward Primer | 0.057               |
| TAK_407     | CGTTCAGAGTTCTACAGTCCGACGATCHHHHACHHH<br>HACHHHNGCAG GAGGTCCARCTGCAACART*C   | FID-Multiplex Forward Primer | 0.076               |
| TAK_408     | CGTTCAGAGTTCTACAGTCCGACGATCHHHHACHHH<br>HACHHHNGCAG CAGGTYCAGCTBCAGCART*C   | FID-Multiplex Forward Primer | 0.132               |
| TAK_409     | CGTTCAGAGTTCTACAGTCCGACGATCHHHHACHHH<br>HACHHHNGCAG CAGGTYCARTGCAGCAGT*C    | FID-Multiplex Forward Primer | 0.038               |
| TAK_410     | CGTTCAGAGTTCTACAGTCCGACGATCHHHHACHHH<br>HACHHHNGCAG CAGGTCCACGTGAAGCAGT*C   | FID-Multiplex Forward Primer | 0.019               |
| TAK_411     | CGTTCAGAGTTCTACAGTCCGACGATCHHHHACHHH<br>HACHHHNGCAG GAGGTGAASSTGGTGAAT*C    | FID-Multiplex Forward Primer | 0.038               |
| TAK_412     | CGTTCAGAGTTCTACAGTCCGACGATCHHHHACHHH<br>HACHHHNGCAG GAVGTGAWGYTGGTGGAGT*C   | FID-Multiplex Forward Primer | 0.095               |
| TAK_413     | CGTTCAGAGTTCTACAGTCCGACGATCHHHHACHHH<br>HACHHHNGCAG GAGGTGCAGSKGGTGGAGT*C   | FID-Multiplex Forward Primer | 0.038               |
| TAK_414     | CGTTCAGAGTTCTACAGTCCGACGATCHHHHACHHH<br>HACHHHNGCAG GAKGTGCAMCTGGTGGAGT*C   | FID-Multiplex Forward Primer | 0.038               |
| TAK_415     | CGTTCAGAGTTCTACAGTCCGACGATCHHHHACHHH<br>HACHHHNGCAG GAGGTGAAGCTGATGGART*C   | FID-Multiplex Forward Primer | 0.038               |
| TAK_416     | CGTTCAGAGTTCTACAGTCCGACGATCHHHHACHHH<br>HACHHHNGCAG GAGGTGCARCTTGTGAGT*C    | FID-Multiplex Forward Primer | 0.019               |
| TAK_417     | CGTTCAGAGTTCTACAGTCCGACGATCHHHHACHHH<br>HACHHHNGCAG GARGTRAAGCTTCTCGAGT*C   | FID-Multiplex Forward Primer | 0.038               |
| TAK_418     | CGTTCAGAGTTCTACAGTCCGACGATCHHHHACHHH<br>HACHHHNGCAG GAAGTGAARSTTGAGGAGT*C   | FID-Multiplex Forward Primer | 0.038               |
| TAK_419     | CGTTCAGAGTTCTACAGTCCGACGATCHHHHACHHH<br>HACHHHNGCAG CAGGTTACTCTRAAAGWGTST*G | FID-Multiplex Forward Primer | 0.095               |
| TAK_420     | CGTTCAGAGTTCTACAGTCCGACGATCHHHHACHHH<br>HACHHHNGCAG CAGGTCCAACVTCAGCARC*C   | FID-Multiplex Forward Primer | 0.066               |
| TAK_421     | CGTTCAGAGTTCTACAGTCCGACGATCHHHHACHHH<br>HACHHHNGCAG GATGTGAACTTGAAGTGT*C    | FID-Multiplex Forward Primer | 0.013               |
| TAK_422     | CGTTCAGAGTTCTACAGTCCGACGATCHHHHACHHH<br>HACHHHNGCAG GAGGTGAAGGTCATCGAGT*C   | FID-Multiplex Forward Primer | 0.013               |

**Table S5. A complete list of primers and sequences used in this study. (cont.)**

New reduced multiplex-PCR primer set (TAK) for mouse  $V_H$   
MAF-modified regions

| Primer Name | Sequence (5' - 3')                                                                        | Function                     | Ratio in primer set |
|-------------|-------------------------------------------------------------------------------------------|------------------------------|---------------------|
| TAK_562     | CGTTCAGAGTTCTACAGTCCGACGATCHHHHACHHHHACH<br>HHNGCAG GAGGTGAAGCTTCTCGAGT*C                 | FID-Multiplex Forward Primer | 0.067               |
| TAK_564     | CGTTCAGAGTTCTACAGTCCGACGATCHHHHACHHHHACH<br>HHNGCAG GAGGTGCAGCTTGTTGAGT*C                 | FID-Multiplex Forward Primer | 0.067               |
| TAK_568     | CGTTCAGAGTTCTACAGTCCGACGATCHHHHACHHHHACH<br>HHNGCAG CAGATCCAGTTGGTGCAGT*C                 | FID-Multiplex Forward Primer | 0.067               |
| TAK_575     | CGTTCAGAGTTCTACAGTCCGACGATCHHHHACHHHHACH<br>HHNGCAG GAAGTGCAGCTGTTGGAGA*C                 | FID-Multiplex Forward Primer | 0.067               |
| TAK_582     | CGTTCAGAGTTCTACAGTCCGACGATCHHHHACHHHHACH<br>HHNGCAG CAGGT/ideoxyI/CAGCTGCAGCAGY*C         | FID-Multiplex Forward Primer | 0.067               |
| TAK_583     | CGTTCAGAGTTCTACAGTCCGACGATCHHHHACHHHHACH<br>HHNGCAG CAGGTTM/ideoxyI/GCTGCAACAGT*C         | FID-Multiplex Forward Primer | 0.067               |
| TAK_584     | CGTTCAGAGTTCTACAGTCCGACGATCHHHHACHHHHACH<br>HHNGCAG CAGGTYCA/ideoxyI/CT/ideoxyI/CAGCAGT*C | FID-Multiplex Forward Primer | 0.067               |
| TAK_585     | CGTTCAGAGTTCTACAGTCCGACGATCHHHHACHHHHACH<br>HHNGCAG CAGGTGCAGCTGAAGSAGT*C                 | FID-Multiplex Forward Primer | 0.067               |
| TAK_586     | CGTTCAGAGTTCTACAGTCCGACGATCHHHHACHHHHACH<br>HHNGCAG GAGGTGCAGCTTCAGGAGT*C                 | FID-Multiplex Forward Primer | 0.067               |
| TAK_587     | CGTTCAGAGTTCTACAGTCCGACGATCHHHHACHHHHACH<br>HHNGCAG GAAGTGAA/ideoxyI/CTTGAGGWGT*C         | FID-Multiplex Forward Primer | 0.067               |
| TAK_588     | CGTTCAGAGTTCTACAGTCCGACGATCHHHHACHHHHACH<br>HHNGCAG CAGGTTACTCTGAAAGAG*T                  | FID-Multiplex Forward Primer | 0.067               |
| TAK_589     | CGTTCAGAGTTCTACAGTCCGACGATCHHHHACHHHHACH<br>HHNGCAG CAGAT/ideoxyI/CAGCTT/ideoxyI/AGGAGT*C | FID-Multiplex Forward Primer | 0.067               |
| TAK_590     | CGTTCAGAGTTCTACAGTCCGACGATCHHHHACHHHHACH<br>HHNGCAG GAGGTG/ideoxyI/AGCTGGTGGAGT*C         | FID-Multiplex Forward Primer | 0.067               |
| TAK_591     | CGTTCAGAGTTCTACAGTCCGACGATCHHHHACHHHHACH<br>HHNGCAG GAGGTGCAGCTTGTAGAGA*C                 | FID-Multiplex Forward Primer | 0.067               |
| TAK_612     | CGTTCAGAGTTCTACAGTCCGACGATCHHHHACHHHHACH<br>HHNGCAG CAGGT/ideoxyI/CAGCTGCAGCAGc*C         | FID-Multiplex Forward Primer | 0.067               |



**Table S5. A complete list of primers and sequences used in this study. (cont.)**

ddPCR Primers

| Primer Name | Sequence (5' - 3')                         | Function                          |
|-------------|--------------------------------------------|-----------------------------------|
| TAK_530     | GTC TC/ideoxyl/ /ideoxyl/CA GCC AAA AC     | Forward J Gene Amplifying         |
| TAK_522     | TGGCACCCGAGAATTC                           | Reverse Illumina Adapter Amplying |
| TAK_498     | /56-FAM/C+C+A GT+G GAT +A+GA +C/3IABkFQ/   | Biological Isotype Probe          |
| TAK_499     | /5HEX/CG+T C+T+G ACT +AGA +ACT +C/3IABkFQ/ | Spike-In Isotype Probe            |

| Synthetic spike-in standard clones (CDR3 a.a. sequence) | V Gene    | Relative Spike-In Frequency (%) | Somatic Hypermutations (nt) |                   |                       | Unique CDR3s (a.a.) |                   | Unique Intraclonal Variants (nt) |                     |                                                    |                                              |  |
|---------------------------------------------------------|-----------|---------------------------------|-----------------------------|-------------------|-----------------------|---------------------|-------------------|----------------------------------|---------------------|----------------------------------------------------|----------------------------------------------|--|
|                                                         |           |                                 | Designed SHM                | Read-Based Median | Median of RID Medians | Uncorrected         | Full MAF Pipeline | Uncorrected                      | Full MAF Pipeline   | Average correction (%)                             | Intraclonal diversity index (RID normalized) |  |
| CARIKKIVATYFDYW                                         | IGHV1S81  | 23.38                           | 11                          | 11 ± 0            | 11 ± 0                | 375 ± 9             | 1 ± 0             | 2407 ± 182                       | 67 ± 5              | 97.24                                              | 7 ± 1                                        |  |
| CWILLW                                                  | IGHV6-6   | 17.76                           | 4                           | 4 ± 0             | 4 ± 0                 | 114 ± 20            | 1 ± 0             | 3364 ± 333                       | 78 ± 2              | 97.7                                               | 6 ± 0                                        |  |
| CARMARKW                                                | IGHV14-3  | 16.55                           | 6                           | 6 ± 0             | 6 ± 0                 | 263 ± 12            | 1 ± 0             | 5619 ± 250                       | 100 ± 6             | 98.23                                              | 6 ± 0                                        |  |
| CARLEDIW                                                | IGHV2-9   | 16.17                           | 0                           | 0 ± 0             | 0 ± 0                 | 188 ± 38            | 1 ± 0             | 3033 ± 473                       | 75 ± 5              | 97.54                                              | 7 ± 0                                        |  |
| CARTARIKYW                                              | IGHV3-2   | 8.59                            | 8                           | 8 ± 0             | 8 ± 0                 | 323 ± 18            | 1 ± 0             | 5674 ± 393                       | 57 ± 6              | 99.01                                              | 6 ± 1                                        |  |
| CARINAW                                                 | IGHV14-3  | 4.53                            | 0                           | 0 ± 0             | 0 ± 0                 | 98 ± 10             | 1 ± 0             | 1791 ± 142                       | 31 ± 6              | 98.3                                               | 7 ± 1                                        |  |
| CARSAIW                                                 | IGHV5-6-3 | 4.42                            | 13                          | 13 ± 0            | 13 ± 0                | 90 ± 17             | 1 ± 0             | 1898 ± 143                       | 30 ± 6              | 98.49                                              | 7 ± 1                                        |  |
| CARSKYLARYW                                             | IGHV2-9   | 2.39                            | 13                          | 13 ± 0            | 13 ± 0                | 83 ± 21             | 1 ± 0             | 588 ± 56                         | 15 ± 4              | 97.57                                              | 10 ± 2                                       |  |
| CARMARTINW                                              | IGHV5-6-3 | 1.4                             | 0                           | 0 ± 0             | 0 ± 0                 | 76 ± 12             | 1 ± 0             | 638 ± 112                        | 10 ± 2              | 98.64                                              | 8 ± 0                                        |  |
| CARTHERW                                                | IGHV1-4   | 1.34                            | 0                           | 0 ± 0             | 0 ± 0                 | 69 ± 9              | 1 ± 0             | 694 ± 64                         | 7 ± 2               | 99.08                                              | 6 ± 2                                        |  |
| CARLLINFDYW                                             | IGHV1S81  | 1.28                            | 5                           | 5 ± 0             | 5 ± 0                 | 43 ± 8              | 1 ± 0             | 178 ± 23                         | 3 ± 1               | 98.73                                              | 6 ± 1                                        |  |
| CTHERESAYW                                              | IGHV6-6   | 0.69                            | 0                           | 0 ± 0             | 0 ± 0                 | 33 ± 12             | 1 ± 0             | 233 ± 94                         | 5 ± 3               | 98.34                                              | 9 ± 4                                        |  |
| CARSIMANW                                               | IGHV3-2   | 0.53                            | 8                           | 8 ± 0             | 8 ± 0                 | 65 ± 6              | 1 ± 0             | 552 ± 63                         | 6 ± 2               | 99.15                                              | 10 ± 2                                       |  |
| CARVITRDYW                                              | IGHV1S81  | 0.36                            | 0                           | 0 ± 0             | 0 ± 0                 | 11 ± 1              | 1 ± 0             | 59 ± 6                           | 2 ± 1               | 97.63                                              | 15 ± 8                                       |  |
| CARKSTRASYW                                             | IGHV1-4   | 0.34                            | 3                           | 3 ± 0             | 3 ± 0                 | 42 ± 7              | 1 ± 0             | 210 ± 30                         | 3 ± 2               | 99.19                                              | 8 ± 4                                        |  |
| CRISTINAW                                               | IGHV14-3  | 0.28                            | 9                           | 9 ± 0             | 9 ± 0                 | 27 ± 5              | 1 ± 0             | 143 ± 18                         | 2 ± 0               | 99.29                                              | 8 ± 1                                        |  |
|                                                         |           |                                 |                             |                   |                       |                     |                   |                                  |                     | <b>Average correction across all spike-ins (%)</b> |                                              |  |
|                                                         |           |                                 |                             |                   |                       |                     |                   |                                  |                     | <b>98.38</b>                                       |                                              |  |
| <b>Pearson Coefficient (compared to frequency)</b>      |           |                                 |                             |                   |                       | <b>0.819 (****)</b> | <b>0 (ns)</b>     | <b>0.726 (**)</b>                | <b>0.925 (****)</b> | <b>-0.449 (ns)</b>                                 |                                              |  |

**Table S6. Error correction statistics for spike in clones.** The intraclonal diversity index was determined for each clone by dividing the number of intraclonal variants by the clonal count (based on RID-count). Ig-seq data are from replicate MAF library sample preparations ( $n = 3$ ) from mouse splenic cDNA with ~10% synthetic spike-ins (mean values are from replicate datasets IM\_1a, \_1b, 1c, see table S7). Relative spike-in frequencies are mean values obtained from replicate libraries ( $n = 5$ ) generated by singleplex PCR (see fig. S2 and table S1).

| Column #  | 1       | 2                        | 3                      | 4                   | 5               | 6                      | 7                               | 8                                   | 9                   | 10                                    |
|-----------|---------|--------------------------|------------------------|---------------------|-----------------|------------------------|---------------------------------|-------------------------------------|---------------------|---------------------------------------|
|           | Dataset | Initial Paired-End Reads | Merged Reads After CLC | Percent Passing CLC | Processed Reads | Reads with FID and RID | % of Reads w/ FID and RID Found | Initial Unique FID/RID Combinations | Initial Unique RIDs | Corrected Unique FID/RID Combinations |
| Immunized | IM_1a   | 2.69E+06                 | 1.04E+06               | 77.3                | 1.0E+06         | 9.49E+05               | 94.9                            | 4.85E+05                            | 1.01E+05            | 4.54E+05                              |
|           | IM1_b   | 3.01E+06                 | 1.17E+06               | 77.8                | 1.0E+06         | 1.00E+06               | 100.0                           | 4.25E+05                            | 1.01E+05            | 3.91E+05                              |
|           | IM_1c   | 2.75E+06                 | 1.01E+06               | 73.6                | 1.0E+06         | 9.16E+05               | 91.6                            | 4.70E+05                            | 1.00E+05            | 4.39E+05                              |
|           | IM_2    | 2.77E+06                 | 1.04E+06               | 74.8                | 1.0E+06         | 9.25E+05               | 92.5                            | 4.23E+05                            | 8.51E+04            | 3.85E+05                              |
|           | IM_3    | 2.70E+06                 | 1.01E+06               | 75.2                | 1.0E+06         | 9.01E+05               | 90.1                            | 4.47E+05                            | 9.86E+04            | 4.08E+05                              |
| Untreated | UM_1    | 7.18E+06                 | 1.22E+06               | 34.0                | 1.0E+06         | 1.00E+06               | 100.0                           | 6.00E+05                            | 1.51E+05            | 5.60E+05                              |
|           | UM_2    | 1.73E+07                 | 1.27E+06               | 14.6                | 1.0E+06         | 1.00E+06               | 100.0                           | 5.93E+05                            | 1.27E+05            | 5.52E+05                              |
|           | UM_3    | 7.01E+06                 | 1.10E+06               | 31.4                | 1.0E+06         | 9.83E+05               | 98.3                            | 5.46E+05                            | 1.36E+05            | 5.08E+05                              |

| Column #  | 1       | 11                    | 12                   | 13                  | 14                        | 15                             | 16                                           | 17                       | 18                   | 19             | 20                  |
|-----------|---------|-----------------------|----------------------|---------------------|---------------------------|--------------------------------|----------------------------------------------|--------------------------|----------------------|----------------|---------------------|
|           | Dataset | Corrected Unique RIDs | % of RFIDs Corrected | % of RIDs Corrected | Consensus Building Groups | % of "double tagged" sequences | % of Sequences in a Group size of at Least 3 | % of Sequences Corrected | Raw Productive Reads | Raw % of reads | CB Productive Reads |
| Immunized | IM_1a   | 8.51E+04              | 6.3                  | 15.4                | 9.15E+04                  | 1.3                            | 95.5                                         | 42.1                     | 7.44E+05             | 78.49          | 8.73E+05            |
|           | IM1_b   | 8.16E+04              | 7.9                  | 18.9                | 8.68E+04                  | 1.2                            | 96.5                                         | 43.2                     | 7.88E+05             | 78.75          | 9.26E+05            |
|           | IM_1c   | 8.45E+04              | 6.6                  | 15.8                | 9.08E+04                  | 1.3                            | 95.5                                         | 44.8                     | 7.13E+05             | 77.77          | 8.43E+05            |
|           | IM_2    | 6.11E+04              | 9.1                  | 28.3                | 6.52E+04                  | 0.9                            | 96.8                                         | 41.8                     | 7.40E+05             | 79.91          | 8.81E+05            |
|           | IM_3    | 7.49E+04              | 8.6                  | 24.1                | 8.00E+04                  | 1.1                            | 95.6                                         | 41.1                     | 7.24E+05             | 80.38          | 8.39E+05            |
| Untreated | UM_1    | 1.30E+05              | 6.5                  | 14.2                | 1.39E+05                  | 1.6                            | 91.3                                         | 38.7                     | 7.76E+05             | 77.64          | 9.11E+05            |
|           | UM_2    | 1.05E+05              | 6.9                  | 17.3                | 1.19E+05                  | 2.1                            | 92.2                                         | 38.6                     | 7.81E+05             | 78.11          | 9.10E+05            |
|           | UM_3    | 1.16E+05              | 6.8                  | 15.1                | 1.23E+05                  | 1.4                            | 92.6                                         | 39.5                     | 7.73E+05             | 78.60          | 9.07E+05            |

| Column #  | 1       | 21            | 22                          | 23                         | 24                                       | 25                                            | 26                              | 27                                 | 28                               | 29                                  | 30                                            |
|-----------|---------|---------------|-----------------------------|----------------------------|------------------------------------------|-----------------------------------------------|---------------------------------|------------------------------------|----------------------------------|-------------------------------------|-----------------------------------------------|
|           | Dataset | CB % of reads | Raw Unique Productive CDR3s | CB Unique Productive CDR3s | CB Productive CDR3s deemed hotspot error | % of CB Productive CDR3s deemed hotspot error | Additional F3+<3 Clones Removed | % F3<3 Clones removed post hotspot | Final Good Unique Filtered CDR3s | % final clones of initial CB clones | % of VDJ output reads in final filtered CDR3s |
| Immunized | IM_1a   | 92.03         | 4.44E+04                    | 3.42E+03                   | 2.06E+02                                 | 6.03                                          | 1.93E+03                        | 60.00                              | 1.28E+03                         | 37.59                               | 79.1                                          |
|           | IM1_b   | 92.64         | 4.67E+04                    | 3.50E+03                   | 2.14E+02                                 | 6.11                                          | 1.98E+03                        | 60.27                              | 1.31E+03                         | 37.30                               | 81.7                                          |
|           | IM_1c   | 91.97         | 4.49E+04                    | 3.35E+03                   | 2.17E+02                                 | 6.48                                          | 1.87E+03                        | 59.62                              | 1.26E+03                         | 37.77                               | 79.6                                          |
|           | IM_2    | 95.21         | 4.44E+04                    | 3.03E+03                   | 1.82E+02                                 | 6.01                                          | 1.85E+03                        | 64.84                              | 1.00E+03                         | 33.05                               | 79.3                                          |
|           | IM_3    | 93.20         | 4.37E+04                    | 3.23E+03                   | 2.02E+02                                 | 6.26                                          | 1.85E+03                        | 61.04                              | 1.18E+03                         | 36.52                               | 76.2                                          |
| Untreated | UM_1    | 91.07         | 5.46E+04                    | 7.44E+03                   | 3.10E+02                                 | 4.17                                          | 5.18E+03                        | 72.61                              | 1.95E+03                         | 26.25                               | 84.1                                          |
|           | UM_2    | 91.04         | 5.88E+04                    | 7.57E+03                   | 3.05E+02                                 | 4.03                                          | 5.47E+03                        | 75.29                              | 1.79E+03                         | 23.71                               | 76.7                                          |
|           | UM_3    | 92.24         | 5.72E+04                    | 8.05E+03                   | 3.59E+02                                 | 4.46                                          | 5.70E+03                        | 74.06                              | 2.00E+03                         | 24.78                               | 81.3                                          |

**Table S7. Expanded Ig-seq processing statistics.** Datasets IM\_1a, \_1b, \_1c correspond to replicate library sample preparations ( $n = 3$ ) of a hyperimmunized mouse. Datasets IM\_2, IM\_3 correspond to 2 different hyperimmunized mice and UM\_1, UM\_2, UM\_3 correspond to 3 different untreated mice. All datasets were from MAF library preparation of splenic cDNA with ~10% synthetic spike-ins.
